# Supplementary material for: Dearomative [3 + 2] cycloaddition reaction of nitrobenzothiophenes with nonstabilized azomethine ylides
Source: Royal Society of Chemistry journal article supplement (doi:10.1039/d0ra05687a), 2020-01-01

# Dearomative [3 + 2] Cycloaddition Reaction of Nitrobenzothiophenes with Nonstabilized Azomethine Ylides

Kai-Kai Wang,<sup>a</sup> Yan-Xin Xie,<sup>b</sup> Yan-Li Li,<sup>c</sup> Yongxiang Chen<sup>a</sup> and Zhan-Yong Wang<sup>\*a</sup>

<sup>a</sup> School of Pharmacy, Xinxiang University, Xinxiang 453000, P.R. of China

<sup>b</sup> School of Chemistry and Materials Engineering, Xinxiang University, Xinxiang 453000, P.R. of China

<sup>c</sup> Medical College, Xinxiang University, Xinxiang 453000, P.R. of China

E-mail: zhanyongw@126.com

## Supporting Information

### Table of Contents

1. General methods
2. Some new substrates of nitrobenzo[*b*]thiophenes
3. General procedure for [3+2] dipolar cycloaddition
4. Transformations of product 3a
5. X-ray crystal structure of compound 3d
6. NMR spectra

## 1. General methods

NMR data were obtained for  $^1\text{H}$  at 400 MHz, and for  $^{13}\text{C}$  at 100 MHz. Chemical shifts were reported in ppm from tetramethylsilane with the solvent resonance as the internal standard in  $\text{CDCl}_3$  solution. ESI HRMS was recorded on a Waters SYNAPT G2. Column chromatography was performed on silica gel (300-400 mesh) eluting with ethyl acetate/petroleum ether. TLC was performed on glass-backed silica plates. UV light,  $\text{I}_2$ , and solution of potassium permanganate were used to visualize products. All chemicals were used without purification as commercially available unless otherwise noted. Petroleum ether and ethyl acetate were distilled. Unless otherwise noted, experiments involving moisture and/or air sensitive components were performed under a positive pressure of argon in oven-dried glassware equipped with a rubber septum inlet. Dried solvents and liquid reagents were transferred by oven-dried syringes. 3-Nitrobenzo[*b*]thiophenes<sup>1</sup> and 2-nitrobenzo[*b*]thiophene<sup>2</sup> were prepared according to the literature procedures. 2-Nitrobenzofuran was prepared according to the literature procedures.<sup>3</sup>

- (1)(a) K. Tanemura, T. Suzuki, Y. Nishida, K. Satsumabayashi and T. Horaguchi, *J. Chem. Res-s.*, 2003, 497.  
(b) J.-Q. Zhao, L. Yang, Y. You, Z.-H. Wang, K.-X. Xie, X.-M. Zhang, X.-Y. Xu and W.-C. Yuan, *Org. Biomol. Chem.*, 2019, **17**, 5294.
- (2) C. O. Hayes, W. K. Bell, B. R. Cassidy and C. G. Willson, *J. Org. Chem.*, 2015, **80**, 7530.
- (3) (a) F. Yang, K. Rauch, K. Kettelhoit and L. Ackermann, *Angew. Chem., Int. Ed.*, 2014, **53**, 11285; (b) H. Wang, J. Zhang, Y. Tu and J. Zhang, *Angew. Chem., Int. Ed.*, 2019, **58**, 5422.

## 2. Some new substrates of nitrobenzo[*b*]thiophenes

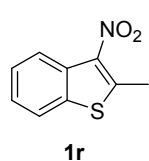

**2-methyl-3-nitrobenzo[*b*]thiophene:**  $^1\text{H}$  NMR (400 MHz,  $\text{CDCl}_3$ )  $\delta$  8.46 (d,  $J = 8.0$  Hz, 1H), 7.75 (d,  $J = 8.0$  Hz, 1H), 7.54 (t,  $J = 7.6$  Hz, 1H), 7.44 (t,  $J = 7.6$  Hz, 1H), 2.94 (s, 3H) ppm.  $^{13}\text{C}$  NMR (100 MHz,  $\text{CDCl}_3$ )  $\delta$  149.3, 138.7, 134.4, 132.1, 126.7, 125.9, 123.7, 121.9, 17.2 ppm. ESI-HRMS: calcd. for  $\text{C}_9\text{H}_7\text{NO}_2\text{S}+\text{H}^+$  194.0270, found 194.0269.

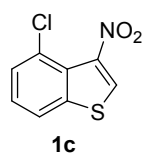

**4-chloro-3-nitrobenzo[*b*]thiophene:**  $^1\text{H}$  NMR (400 MHz,  $\text{CDCl}_3$ )  $\delta$  8.36 (s, 1H), 7.75 – 7.71 (m, 1H), 7.53 – 7.48 (m, 2H) ppm.  $^{13}\text{C}$  NMR (100 MHz,  $\text{CDCl}_3$ )  $\delta$  151.6, 141.0, 134.9, 132.0, 129.8, 126.1, 123.8, 121.4 ppm. ESI-HRMS: calcd. for  $\text{C}_8\text{H}_4\text{ClNO}_2\text{S}+\text{H}^+$  213.9724, found 213.9721.

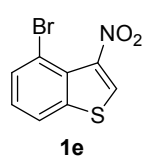

**4-bromo-3-nitrobenzo[*b*]thiophene:**  $^1\text{H}$  NMR (400 MHz,  $\text{CDCl}_3$ )  $\delta$  8.34 (s, 1H), 7.78 (d,  $J = 8.0$  Hz, 1H), 7.67 (d,  $J = 8.0$  Hz, 1H), 7.43 (t,  $J = 8.0$  Hz, 1H) ppm.  $^{13}\text{C}$  NMR (100 MHz,  $\text{CDCl}_3$ )  $\delta$  151.5, 140.7, 136.5, 129.9, 129.5, 125.8, 122.0, 120.6 ppm. ESI-HRMS: calcd. for  $\text{C}_8\text{H}_4\text{BrNO}_2\text{S}+\text{H}^+$  257.9219, found 257.9219.

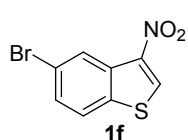

**5-bromo-3-nitrobenzo[b]thiophene:**  $^1\text{H}$  NMR (400 MHz,  $\text{CDCl}_3$ )  $\delta$  8.80 (s, 1H), 8.71 (s, 1H), 7.75 (d,  $J = 8.8$  Hz, 1H), 7.63 (d,  $J = 8.8$  Hz, 1H) ppm.  $^{13}\text{C}$  NMR (100 MHz,  $\text{CDCl}_3$ )  $\delta$  141.8, 137.2, 134.0, 131.5, 129.8, 126.8, 124.2, 121.8 ppm. ESI-HRMS: calcd. for  $\text{C}_8\text{H}_4\text{BrNO}_2\text{S}+\text{H}^+$  257.9219, found 257.9220.

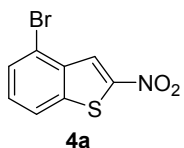

**4-bromo-2-nitrobenzo[b]thiophene:**  $^1\text{H}$  NMR (400 MHz,  $\text{CDCl}_3$ )  $\delta$  8.16 (s, 1H), 7.84 (d,  $J = 8.0$  Hz, 1H), 7.73 (d,  $J = 7.6$  Hz, 1H), 7.33 (t,  $J = 8.0$  Hz, 1H) ppm.  $^{13}\text{C}$  NMR (100 MHz,  $\text{CDCl}_3$ )  $\delta$  144.2, 140.4, 132.0, 128.5, 128.0, 127.1, 122.3, 115.6 ppm. ESI-HRMS: calcd. for  $\text{C}_8\text{H}_4\text{BrNO}_2\text{S}+\text{H}^+$  257.9219, found 257.9221.

### 3. General procedure for [3+2] dipolar cycloaddition

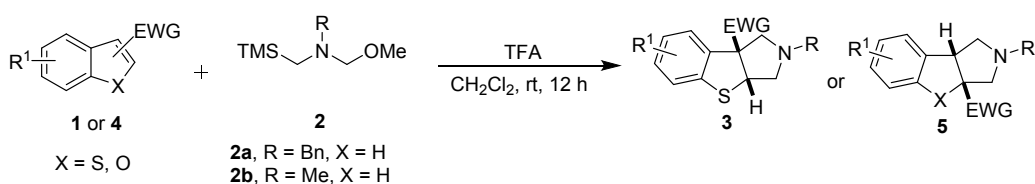

The nitrobenzo[b]thiophenes **1** (0.1 mmol), *N*-(methoxymethyl)-*N*-(trimethyl silylmethyl)alkylamine **2** (0.12 mmol), and the TFA (0.1 mmol) were dissolved in  $\text{CH}_2\text{Cl}_2$  (1.0 mL). Then the solution was stirred at rt for 12 h. After completion, the mixture was directly purified by column chromatography on silica gel eluting with petroleum ether/ethyl acetate (30:1 to 10:1) to afford the product **3** and **5**.

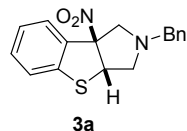

**3a**, 28.1 mg, 90% yield, colorless oil.  $^1\text{H}$  NMR (400 MHz,  $\text{CDCl}_3$ )  $\delta$  7.40 (d,  $J = 7.6$  Hz, 1H), 7.30 (d,  $J = 7.6$  Hz, 3H), 7.28 – 7.24 (m, 3H), 7.19 (d,  $J = 8.0$  Hz, 1H), 7.14 – 7.10 (m, 1H), 4.99 (t,  $J = 7.6$  Hz, 1H), 3.98 (d,  $J = 10.8$  Hz, 1H), 3.63 (dd,  $J = 31.6, 13.2$  Hz, 2H), 3.46 (t,  $J = 8.4$  Hz, 1H), 2.97 (d,  $J = 10.4$  Hz, 1H), 2.60 (dd,  $J = 9.2, 7.6$  Hz, 1H).  $^{13}\text{C}$  NMR (100 MHz,  $\text{CDCl}_3$ )  $\delta$  142.9, 137.2, 135.1, 131.3, 128.6, 128.5, 127.5, 125.6, 125.2, 122.5, 107.1, 64.5, 63.2, 58.6, 52.4. ESI-HRMS: calcd. for  $\text{C}_{17}\text{H}_{16}\text{N}_2\text{O}_2\text{S}+\text{H}^+$  313.1005, found 313.1000.

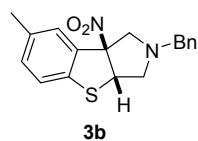

**3b**, 30.0 mg, 92% yield, colorless oil.  $^1\text{H}$  NMR (400 MHz,  $\text{CDCl}_3$ )  $\delta$  7.33 – 7.29 (m, 2H), 7.27 – 7.24 (m, 3H), 7.20 (s, 1H), 7.13 (d,  $J = 8.0$  Hz, 1H), 7.06 (d,  $J = 8.0$  Hz, 1H), 4.97 (t,  $J = 7.2$  Hz, 1H), 4.01 (d,  $J = 10.8$  Hz, 1H), 3.67 (d,  $J = 13.2$  Hz, 1H), 3.57 (d,  $J = 13.2$  Hz, 1H), 3.47 – 3.43 (m, 1H), 2.92 (d,  $J = 10.8$  Hz, 1H), 2.55 (dd,  $J = 9.2, 8.0$  Hz, 1H), 2.29 (s, 3H).  $^{13}\text{C}$  NMR (100 MHz,  $\text{CDCl}_3$ )  $\delta$  139.3, 137.3, 135.23, 135.17, 132.3, 128.6, 128.5, 127.5, 126.0, 122.2, 107.1, 64.4, 63.2, 58.7, 52.8, 20.9. ESI-HRMS: calcd. for  $\text{C}_{18}\text{H}_{18}\text{N}_2\text{O}_2\text{S}+\text{H}^+$  327.1162, found 327.1159.

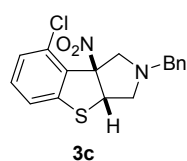

**3c**, 31.1 mg, 90% yield, pale white solid.  $^1\text{H}$  NMR (400 MHz,  $\text{CDCl}_3$ )  $\delta$  7.34 – 7.24 (m, 5H), 7.18 (t,  $J = 7.6$  Hz, 1H), 7.10 (d,  $J = 8.0$  Hz, 1H), 7.00 (d,  $J = 8.0$  Hz, 1H), 5.00 (t,  $J = 7.2$  Hz, 1H), 3.72 – 3.66 (m, 3H), 3.55 (t,  $J = 8.8$  Hz, 1H), 3.23 (d,  $J = 11.4$  Hz, 1H), 2.76 (dd,  $J = 9.2, 6.8$  Hz, 1H).  $^{13}\text{C}$  NMR (100 MHz,  $\text{CDCl}_3$ )  $\delta$  140.6, 137.0, 136.0, 131.2, 130.2,

128.58, 128.56, 127.6, 126.0, 119.5, 106.2, 65.6, 59.4, 58.5, 57.7. ESI-HRMS: calcd. for  $C_{17}H_{15}ClN_2O_2S+H^+$  347.0616, found 347.0614.

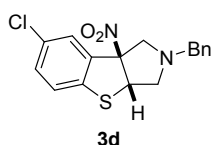

**3d**, 31.5 mg, 91% yield, pale white solid.  $^1H$  NMR (400 MHz,  $CDCl_3$ )  $\delta$  7.40 (d,  $J = 2.0$  Hz, 1H), 7.33 – 7.23 (m, 6H), 7.10 (d,  $J = 8.4$  Hz, 1H), 5.02 (t,  $J = 7.2$  Hz, 1H), 3.91 (d,  $J = 10.8$  Hz, 1H), 3.63 (dd,  $J = 38.8, 13.2$  Hz, 2H), 3.46 – 3.41 (m, 1H), 2.98 (d,  $J = 10.8$  Hz, 1H), 2.61 (dd,  $J = 9.6, 7.2$  Hz, 1H).  $^{13}C$  NMR (100 MHz,  $CDCl_3$ )  $\delta$  141.5, 137.0, 136.6, 131.5, 130.9, 128.6, 127.6, 125.8, 123.4, 106.5, 64.6, 63.0, 58.5, 53.0. ESI-HRMS: calcd. for  $C_{17}H_{15}ClN_2O_2S+H^+$  347.0616, found 347.0616.

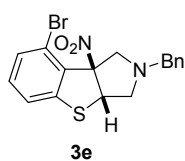

**3e**, 35.9 mg, 92% yield, pale white solid.  $^1H$  NMR (400 MHz,  $CDCl_3$ )  $\delta$  7.34 – 7.24 (m, 6H), 7.09 (t,  $J = 7.6$  Hz, 1H), 7.04 (d,  $J = 8.0$  Hz, 1H), 4.96 (t,  $J = 7.6$  Hz, 1H), 3.72 – 3.68 (m, 2H), 3.63 (d,  $J = 10.8$  Hz, 1H), 3.58 (t,  $J = 8.8$  Hz, 1H), 3.25 (d,  $J = 10.8$  Hz, 1H), 2.79 (dd,  $J = 9.2, 6.4$  Hz, 1H).  $^{13}C$  NMR (100 MHz,  $CDCl_3$ )  $\delta$  140.4, 137.8, 137.0, 130.3, 129.1, 128.59, 128.56, 127.6, 120.1, 120.0, 105.7, 65.5, 59.6, 59.3, 58.5. ESI-HRMS: calcd. for  $C_{17}H_{15}BrN_2O_2S+H^+$  391.0110 ( $^{81}Br$ ) and 393.0090 ( $^{83}Br$ ), found 391.0109, 393.0085.

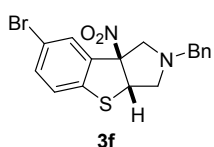

**3f**, 34.3 mg, 88% yield, pale white solid.  $^1H$  NMR (400 MHz,  $CDCl_3$ )  $\delta$  7.54 (d,  $J = 1.6$  Hz, 1H), 7.42 (dd,  $J = 8.4, 2.0$  Hz, 1H), 7.33 – 7.27 (m, 3H), 7.24 (d,  $J = 6.4$  Hz, 2H), 7.05 (d,  $J = 8.4$  Hz, 1H), 5.00 (t,  $J = 7.2$  Hz, 1H), 3.91 (d,  $J = 10.8$  Hz, 1H), 3.63 (dd,  $J = 41.2, 12.8$  Hz, 2H), 3.46 – 3.41 (m, 1H), 2.98 (d,  $J = 10.8$  Hz, 1H), 2.61 (dd,  $J = 9.6, 7.2$  Hz, 1H).  $^{13}C$  NMR (100 MHz,  $CDCl_3$ )  $\delta$  142.1, 137.0, 136.9, 134.3, 128.7, 128.6, 127.6, 123.7, 118.2, 106.4, 64.6, 63.0, 58.5, 52.9. ESI-HRMS: calcd. for  $C_{17}H_{15}BrN_2O_2S+H^+$  391.0110 ( $^{81}Br$ ) and 393.0090 ( $^{83}Br$ ), found 391.0111, 393.0089.

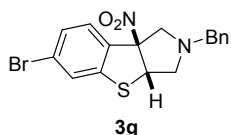

**3g**, 33.9 mg, 87% yield, pale white solid.  $^1H$  NMR (400 MHz,  $CDCl_3$ )  $\delta$  7.33 – 7.26 (m, 4H), 7.25 – 7.22 (m, 4H), 4.99 (t,  $J = 7.2$  Hz, 1H), 3.87 (d,  $J = 10.8$  Hz, 1H), 3.62 (dd,  $J = 28.8, 12.8$  Hz, 2H), 3.44 – 3.39 (m, 1H), 2.97 (d,  $J = 10.8$  Hz, 1H), 2.63 (dd,  $J = 9.6, 6.8$  Hz, 1H).  $^{13}C$  NMR (100 MHz,  $CDCl_3$ )  $\delta$  145.3, 137.0, 134.1, 128.6, 128.5, 128.4, 127.6, 126.8, 125.6, 125.2, 106.3, 64.6, 63.0, 58.6, 52.8. ESI-HRMS: calcd. for  $C_{17}H_{15}BrN_2O_2S+H^+$  391.0110 ( $^{81}Br$ ) and 393.0090 ( $^{83}Br$ ), found 391.0110, 393.0087.

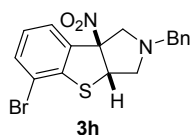

**3h**, 34.7 mg, 89% yield, pale white solid.  $^1H$  NMR (400 MHz,  $CDCl_3$ )  $\delta$  7.47 (d,  $J = 8.0$  Hz, 1H), 7.36 – 7.23 (m, 6H), 7.00 (t,  $J = 7.6$  Hz, 1H), 4.97 (t,  $J = 7.2$  Hz, 1H), 3.91 (d,  $J = 10.8$  Hz, 1H), 3.63 (q,  $J = 12.8$  Hz, 2H), 3.47 – 3.43 (m, 1H), 2.97 (d,  $J = 10.8$  Hz, 1H), 2.66 (dd,  $J = 9.2, 6.8$  Hz, 1H).  $^{13}C$  NMR (100 MHz,  $CDCl_3$ )  $\delta$  145.3, 137.0, 136.1, 134.1, 128.6, 127.6, 126.6, 124.3, 116.0, 108.0, 64.7, 63.0, 58.5, 51.3. ESI-HRMS: calcd. for  $C_{17}H_{15}BrN_2O_2S+H^+$  391.0110 ( $^{81}Br$ ) and 393.0090 ( $^{83}Br$ ), found 391.0110, 393.0087.

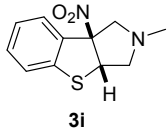

**3i**, 19.8 mg, 84% yield, colorless oil.  $^1\text{H NMR}$  (400 MHz,  $\text{CDCl}_3$ )  $\delta$  7.45 (d,  $J = 8.0$  Hz, 1H), 7.32 (t,  $J = 7.6$  Hz, 1H), 7.19 (d,  $J = 8.0$  Hz, 1H), 7.14 (t,  $J = 7.6$  Hz, 1H), 4.99 (t,  $J = 6.8$  Hz, 1H), 3.82 (d,  $J = 10.4$  Hz, 1H), 3.35 (dd,  $J = 9.6, 8.0$  Hz, 1H), 3.08 (d,  $J = 10.4$  Hz, 1H), 2.69 (dd,  $J = 9.6, 6.4$  Hz, 1H), 2.36 (s, 3H).  $^{13}\text{C NMR}$  (100 MHz,  $\text{CDCl}_3$ )  $\delta$  143.0, 135.0, 131.3, 125.5, 125.2, 122.4, 107.4, 67.1, 65.7, 52.7, 41.2. ESI-HRMS: calcd. for  $\text{C}_{11}\text{H}_{12}\text{N}_2\text{O}_2\text{S}+\text{H}^+$  237.0692, found 237.0692.

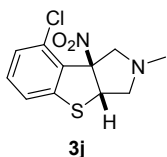

**3j**, 23.2 mg, 86% yield, colorless oil.  $^1\text{H NMR}$  (400 MHz,  $\text{CDCl}_3$ )  $\delta$  7.19 (t,  $J = 8.0$  Hz, 1H), 7.12 (d,  $J = 7.6$  Hz, 1H), 7.01 (d,  $J = 7.6$  Hz, 1H), 4.98 (dd,  $J = 8.8, 5.6$  Hz, 1H), 3.55 (d,  $J = 10.8$  Hz, 1H), 3.38 (t,  $J = 8.8$  Hz, 1H), 3.32 (d,  $J = 10.8$  Hz, 1H), 2.86 (dd,  $J = 9.2, 5.2$  Hz, 1H), 2.40 (s, 3H).  $^{13}\text{C NMR}$  (100 MHz,  $\text{CDCl}_3$ )  $\delta$  140.5, 136.1, 131.1, 130.3, 126.0, 119.5, 106.5, 68.2, 62.0, 58.0, 41.1. ESI-HRMS: calcd. for  $\text{C}_{11}\text{H}_{11}\text{ClN}_2\text{O}_2\text{S}+\text{H}^+$  271.0303, found 271.0303.

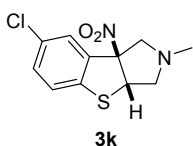

**3k**, 23.0 mg, 85% yield, colorless oil.  $^1\text{H NMR}$  (400 MHz,  $\text{CDCl}_3$ )  $\delta$  7.45 (d,  $J = 2.0$  Hz, 1H), 7.29 (dd,  $J = 8.4, 2.0$  Hz, 1H), 7.11 (d,  $J = 8.4$  Hz, 1H), 5.02 (t,  $J = 6.4$  Hz, 1H), 3.73 (d,  $J = 10.4$  Hz, 1H), 3.32 (dd,  $J = 9.6, 7.6$  Hz, 1H), 3.10 (d,  $J = 10.4$  Hz, 1H), 2.71 (dd,  $J = 9.6, 6.0$  Hz, 1H), 2.36 (s, 3H).  $^{13}\text{C NMR}$  (100 MHz,  $\text{CDCl}_3$ )  $\delta$  141.6, 136.5, 131.5, 130.9, 125.8, 123.3, 106.7, 67.1, 65.6, 53.3, 41.1. ESI-HRMS: calcd. for  $\text{C}_{11}\text{H}_{11}\text{ClN}_2\text{O}_2\text{S}+\text{H}^+$  271.0303, found 271.0303.

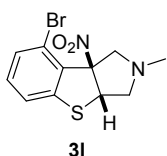

**3l**, 25.7 mg, 82% yield, colorless oil.  $^1\text{H NMR}$  (400 MHz,  $\text{CDCl}_3$ )  $\delta$  7.29 (d,  $J = 7.6$  Hz, 1H), 7.10 (t,  $J = 8.0$  Hz, 1H), 7.05 (d,  $J = 7.6$  Hz, 1H), 4.94 (dd,  $J = 8.4, 5.6$  Hz, 1H), 3.53 (d,  $J = 10.4$  Hz, 1H), 3.42 – 3.34 (m, 2H), 2.89 (dd,  $J = 9.2, 5.2$  Hz, 1H), 2.41 (s, 3H).  $^{13}\text{C NMR}$  (100 MHz,  $\text{CDCl}_3$ )  $\delta$  140.3, 137.9, 130.3, 129.2, 120.1, 120.0, 105.9, 68.1, 62.2, 59.6, 41.1.

ESI-HRMS: calcd. for  $\text{C}_{11}\text{H}_{11}\text{BrN}_2\text{O}_2\text{S}+\text{H}^+$  314.9797 ( $^{81}\text{Br}$ ) and 316.9777 ( $^{83}\text{Br}$ ), found 314.9797, 316.9771.

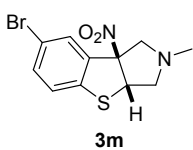

**3m**, 26.1 mg, 83% yield, colorless oil.  $^1\text{H NMR}$  (400 MHz,  $\text{CDCl}_3$ )  $\delta$  7.59 (s, 1H), 7.43 (d,  $J = 8.4$  Hz, 1H), 7.06 (d,  $J = 8.4$  Hz, 1H), 5.01 (t,  $J = 6.4$  Hz, 1H), 3.73 (d,  $J = 10.4$  Hz, 1H), 3.35 – 3.30 (m, 1H), 3.10 (d,  $J = 10.4$  Hz, 1H), 2.71 (dd,  $J = 9.6, 6.0$  Hz, 1H), 2.36 (s, 3H).  $^{13}\text{C NMR}$  (100 MHz,  $\text{CDCl}_3$ )  $\delta$  142.3, 136.8, 134.3, 128.7, 123.6, 118.2, 106.7, 67.1, 65.6, 53.2, 41.1. ESI-HRMS: calcd. for  $\text{C}_{11}\text{H}_{11}\text{BrN}_2\text{O}_2\text{S}+\text{H}^+$  314.9797 ( $^{81}\text{Br}$ ) and 316.9777 ( $^{83}\text{Br}$ ), found 314.9796, 316.9771.

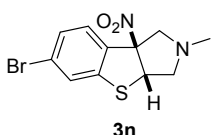

**3n**, 25.4 mg, 81% yield, colorless oil.  $^1\text{H NMR}$  (400 MHz,  $\text{CDCl}_3$ )  $\delta$  7.34 – 7.26 (m, 3H), 5.00 (t,  $J = 6.4$  Hz, 1H), 3.72 (d,  $J = 10.4$  Hz, 1H), 3.34 – 3.30 (m, 1H), 3.08 (d,  $J = 10.4$  Hz, 1H), 2.72 (dd,  $J = 9.6, 5.6$  Hz, 1H), 2.36 (s, 3H).  $^{13}\text{C NMR}$  (100 MHz,  $\text{CDCl}_3$ )  $\delta$  145.4, 134.0, 128.4, 126.7, 125.7, 125.1, 106.5, 67.1, 65.6, 53.1, 41.1. ESI-HRMS: calcd. for  $\text{C}_{11}\text{H}_{11}\text{BrN}_2\text{O}_2\text{S}+\text{H}^+$  314.9797 ( $^{81}\text{Br}$ ) and 316.9777 ( $^{83}\text{Br}$ ), found 314.9797, 316.9775.

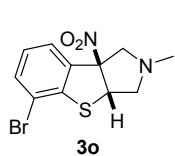

**3o**, 26.4 mg, 84% yield, colorless oil. <sup>1</sup>H NMR (400 MHz, CDCl<sub>3</sub>) δ 7.48 (d, *J* = 8.0 Hz, 1H), 7.42 (d, *J* = 7.6 Hz, 1H), 7.04 (t, *J* = 8.0 Hz, 1H), 4.97 (t, *J* = 6.8 Hz, 1H), 3.74 (d, *J* = 10.4 Hz, 1H), 3.33 (dd, *J* = 9.6, 7.6 Hz, 1H), 3.10 (d, *J* = 10.4 Hz, 1H), 2.76 (dd, *J* = 10.0, 6.0 Hz, 1H), 2.36 (s, 3H). <sup>13</sup>C NMR (100 MHz, CDCl<sub>3</sub>) δ 145.4, 136.0, 134.1, 126.7, 124.2, 115.9, 108.3, 67.3, 65.5, 51.7, 41.1. ESI-HRMS: calcd. for C<sub>11</sub>H<sub>11</sub>BrN<sub>2</sub>O<sub>2</sub>S+H<sup>+</sup> 314.9797 (<sup>81</sup>Br) and 316.9777 (<sup>83</sup>Br), found 314.9797, 316.9773.

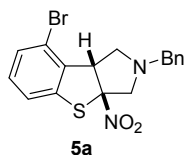

**5a**, 35.5 mg, 91% yield, pale white solid. <sup>1</sup>H NMR (400 MHz, CDCl<sub>3</sub>) δ 7.37 – 7.32 (m, 4H), 7.31 – 7.30 (m, 2H), 7.20 – 7.19 (m, 2H), 4.51 (d, *J* = 12.0 Hz, 1H), 4.42 – 4.38 (m, 1H), 3.74 (q, *J* = 13.2 Hz, 2H), 3.57 – 3.53 (m, 1H), 2.88 (d, *J* = 11.6 Hz, 1H), 2.43 (t, *J* = 9.2 Hz, 1H). <sup>13</sup>C NMR (100 MHz, CDCl<sub>3</sub>) δ 146.3, 137.4, 134.7, 132.2, 129.3, 128.6, 127.5,

121.9, 121.5, 107.3, 63.6, 62.7, 58.6, 55.9. ESI-HRMS: calcd. for C<sub>17</sub>H<sub>15</sub>BrN<sub>2</sub>O<sub>2</sub>S+H<sup>+</sup> 391.0110 (<sup>81</sup>Br) and 393.0090 (<sup>83</sup>Br), found 391.0110, 393.0086.

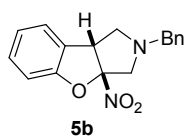

**5b**, 23.9 mg, 90% yield, pale white solid. <sup>1</sup>H NMR (400 MHz, CDCl<sub>3</sub>) δ 7.31 – 7.22 (m, 6H), 7.15 (d, *J* = 7.2 Hz, 1H), 7.01 (t, *J* = 7.0 Hz, 2H), 4.34 (dd, *J* = 7.6, 3.6 Hz, 1H), 3.73 – 3.65 (m, 2H), 3.35 (q, *J* = 10.4 Hz, 2H), 3.18 (t, *J* = 8.6 Hz, 1H), 2.93 (dd, *J* = 9.2, 3.6 Hz, 1H). <sup>13</sup>C NMR (100 MHz, CDCl<sub>3</sub>) δ 158.8, 137.1, 129.4, 128.6, 128.5, 127.5, 126.8, 124.3, 123.0, 122.2,

110.2, 62.8, 60.2, 58.7, 53.7. ESI-HRMS: calcd. for C<sub>17</sub>H<sub>16</sub>N<sub>2</sub>O<sub>3</sub>+H<sup>+</sup> 297.1234, found 297.1234.

#### 4. Transformations of product 3a

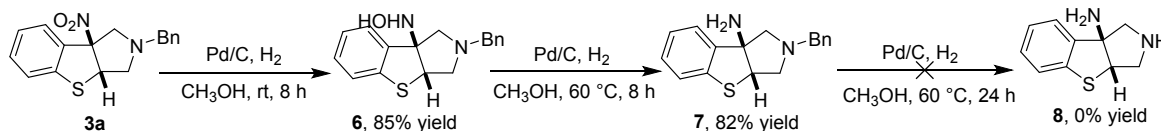

To a solution of compound **3a** (0.5 mmol, 156 mg) in MeOH (5 mL) was added the Pd/C (15.6 mg, 10 wt%), followed by degassing with H<sub>2</sub> for three times at room temperature, and the resultant mixture was then stirred at the room temperature under a balloon pressure of H<sub>2</sub> for 8 h until the reaction was completed as monitored by TLC analysis. Then, the reaction mixture was filtrated off through a celite pad. The filtrate was concentrated under vacuum, and the residue was purified by a flash column chromatography on silica gel (PE /EA = 2:1) to give the product **6** (119.9 mg, 85% yield) as a colourless oil. <sup>1</sup>H NMR (400 MHz, CDCl<sub>3</sub>) δ 7.30 – 7.28 (m, 2H), 7.25 – 7.22 (m, 3H), 7.20 – 7.16 (m, 2H), 7.12 (d, *J* = 7.6 Hz, 1H), 7.04 (t, *J* = 7.2 Hz, 1H), 6.08 (br, 1H), 5.52 (br, 1H), 4.24 (t, *J* = 7.2 Hz, 1H), 3.54 (dd, *J* = 31.6, 12.8 Hz, 2H), 3.35 – 3.31 (m, 1H), 3.12 (d, *J* = 10.0 Hz, 1H), 2.60 – 2.51 (m, 2H). <sup>13</sup>C NMR (100 MHz, CDCl<sub>3</sub>) δ 142.3, 139.6, 137.9, 129.5, 128.8, 128.4, 127.3, 125.6, 124.4, 122.1, 84.2, 63.6, 63.1, 59.4, 50.7. ESI-HRMS: calcd. for C<sub>17</sub>H<sub>18</sub>N<sub>2</sub>OS+H<sup>+</sup> 299.1213, found 299.1214.

To a solution of compound **6** (0.3 mmol, 90 mg) in MeOH (2 mL) was added the Pd/C (9.0 mg, 10 wt%), followed by degassing with H<sub>2</sub> for three times at room temperature, and the resultant mixture was then stirred at the 60 °C under a balloon pressure of H<sub>2</sub> for 8 h until the reaction was completed as monitored by TLC analysis. Then, the reaction mixture was filtrated off through a celite pad. The filtrate was concentrated under vacuum, and the residue was purified by a flash column chromatography on silica gel (PE /EA = 1:1) to give the product **7** (69.4 mg, 82% yield) as a colourless oil. <sup>1</sup>H NMR (400 MHz, CDCl<sub>3</sub>) δ 7.29 – 7.23 (m, 5H), 7.21 – 7.16 (m, 2H), 7.12 – 7.05 (m, 2H), 3.83 (t, *J* = 6.4 Hz, 1H), 3.59 (q, *J* = 13.2 Hz, 2H), 3.33 (dd, *J* = 9.6, 7.2 Hz, 1H), 2.93 (d, *J* = 9.6 Hz, 1H), 2.81 (d, *J* = 9.6 Hz, 1H), 2.65 (dd, *J* = 9.6, 5.6 Hz, 1H), 1.96 (s, 2H). <sup>13</sup>C NMR (100 MHz, CDCl<sub>3</sub>) δ 143.7, 140.6, 138.2, 129.0, 128.7, 128.3, 127.1, 124.9, 124.7, 121.8, 76.5, 67.9, 63.3, 59.5, 59.1. ESI-HRMS: calcd. for C<sub>17</sub>H<sub>18</sub>N<sub>2</sub>S+H<sup>+</sup> 283.1263, found 283.1263.

## 5. X-ray crystal structure of compound **3d**

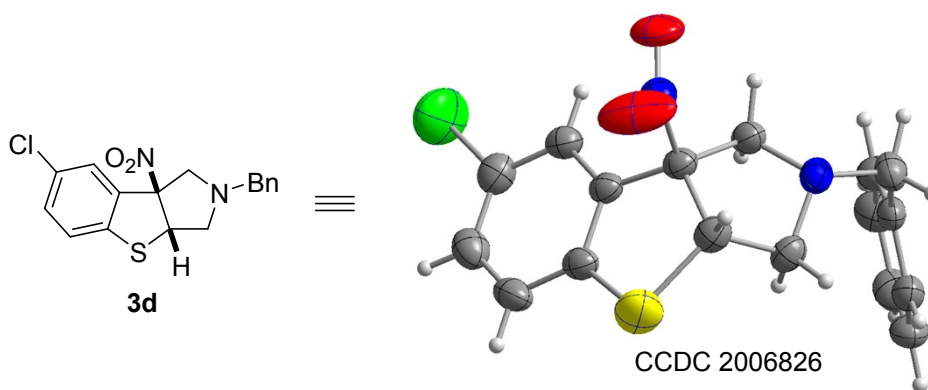

|                     |                                                                   |
|---------------------|-------------------------------------------------------------------|
| Identification code | <b>3d</b>                                                         |
| Empirical formula   | C <sub>17</sub> H <sub>15</sub> ClN <sub>2</sub> O <sub>2</sub> S |
| Formula weight      | 346.82                                                            |
| Temperature/K       | 296                                                               |
| Crystal system      | Monoclinic                                                        |
| Space group         | P 21/c                                                            |
| <i>a</i> /Å         | 10.768(2)                                                         |
| <i>b</i> /Å         | 10.433(2)                                                         |
| <i>c</i> /Å         | 14.800(5)                                                         |
| <i>α</i> /°         | 90                                                                |
| <i>β</i> /°         | 103.502(3)                                                        |
| <i>γ</i> /°         | 90                                                                |

|                                    |                                                   |
|------------------------------------|---------------------------------------------------|
| Volume/Å <sup>3</sup>              | 1616.8(6)                                         |
| Z                                  | 4                                                 |
| ρ <sub>calc</sub> /cm <sup>3</sup> | 1.425                                             |
| μ/mm <sup>-1</sup>                 | 0.376                                             |
| F(000)                             | 720.0                                             |
| Crystal size/mm <sup>3</sup>       | 0.26 × 0.24 × 0.22                                |
| Radiation                          | MoKα (λ = 0.71073)                                |
| 2Θ range for data collection/°     | 2.756 to 25.497                                   |
| Index ranges                       | -13 ≤ h ≤ 12, -7 ≤ k ≤ 12, -17 ≤ l ≤ 17           |
| Reflections collected              | 8288                                              |
| Independent reflections            | 2411[R <sub>int</sub> = 0.0393]                   |
| Data/restraints/parameters         | 2990 / 0 / 208                                    |
| Goodness-of-fit on F <sup>2</sup>  | 1.022                                             |
| Final R indexes [I ≥ 2σ (I)]       | R <sub>1</sub> = 0.0393, wR <sub>2</sub> = 0.1041 |
| R indices (all data)               | R <sub>1</sub> = 0.0510, wR <sub>2</sub> = 0.1106 |
| Largest diff. peak and hole        | 0.042 / -0.303                                    |



## 6. NMR spectra

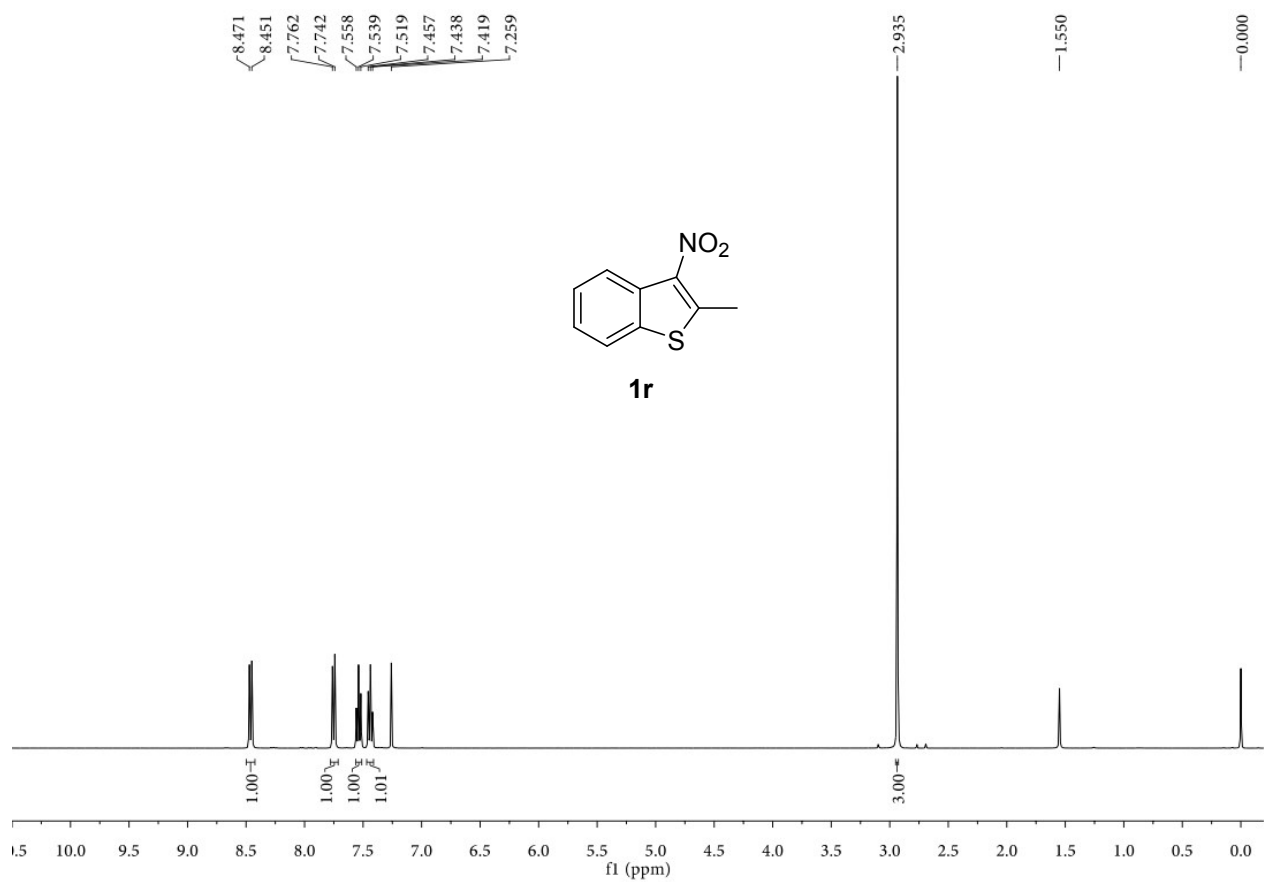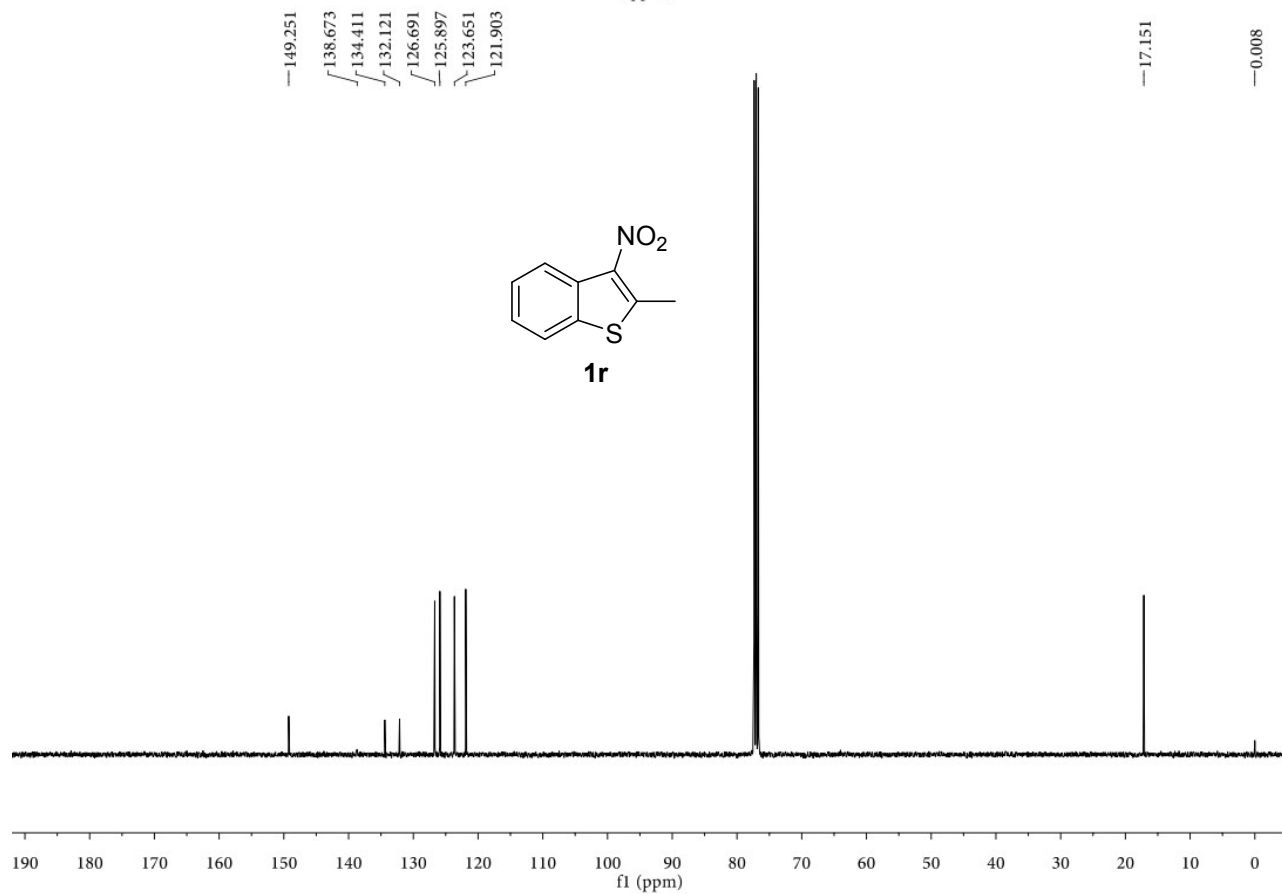

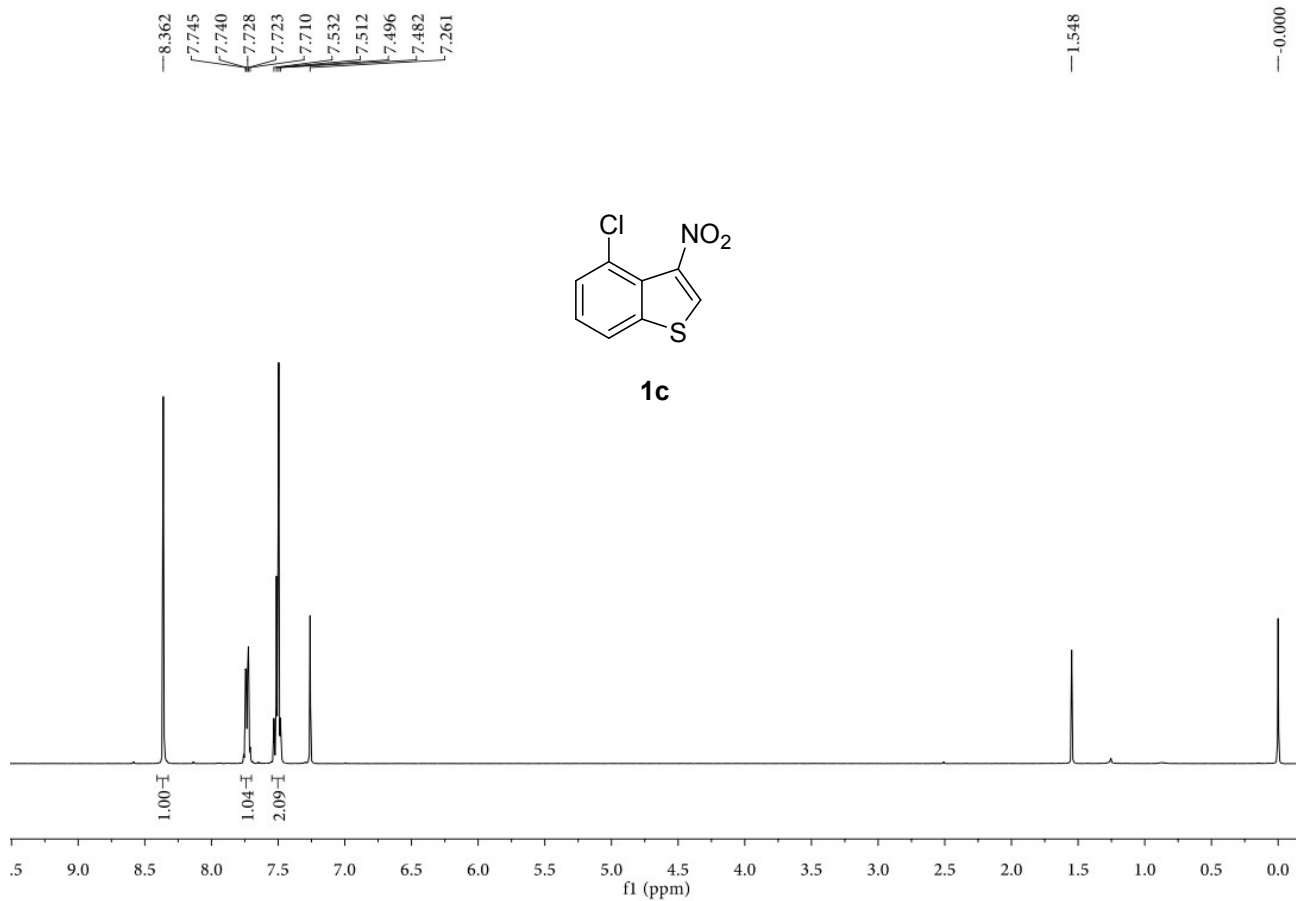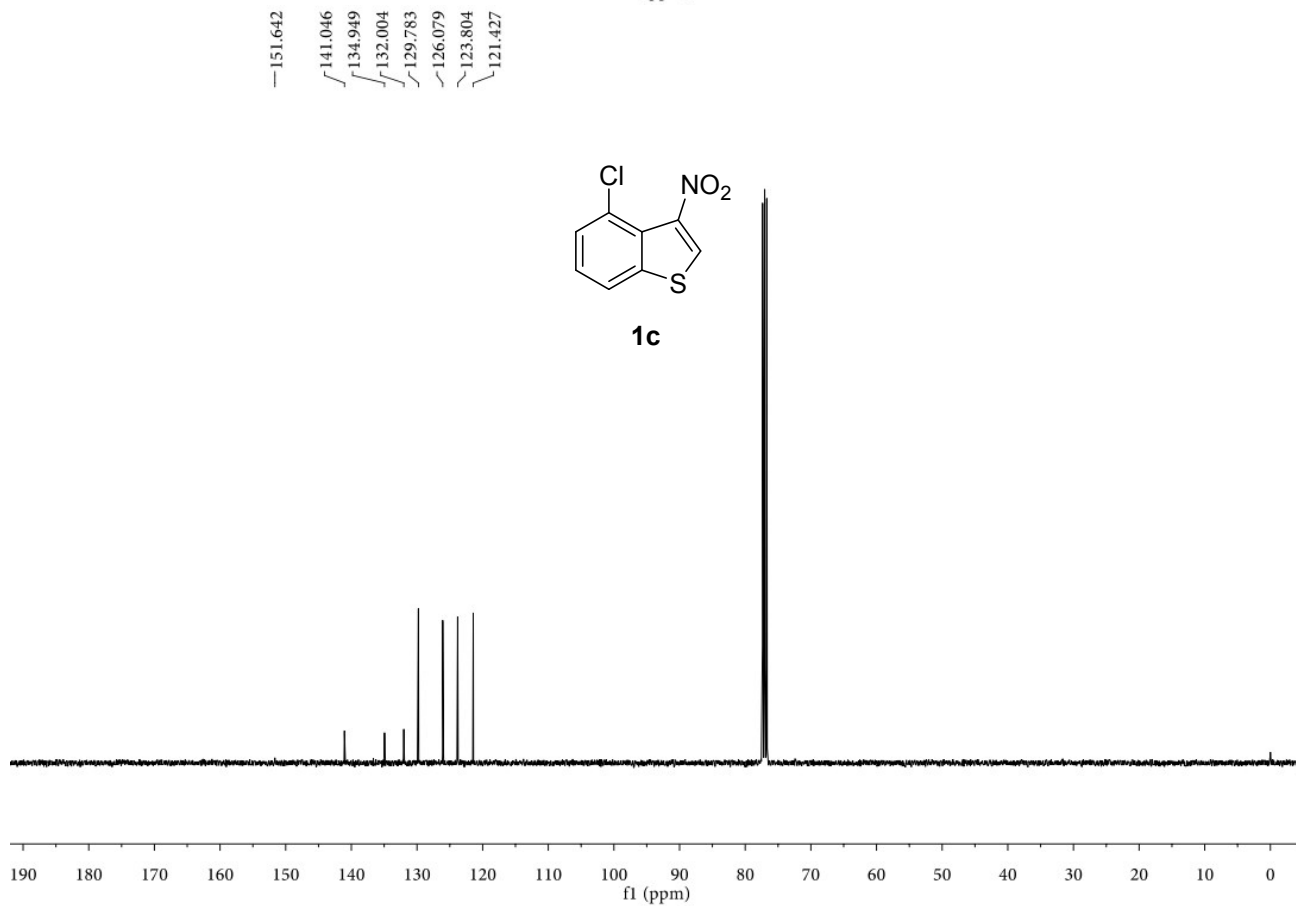

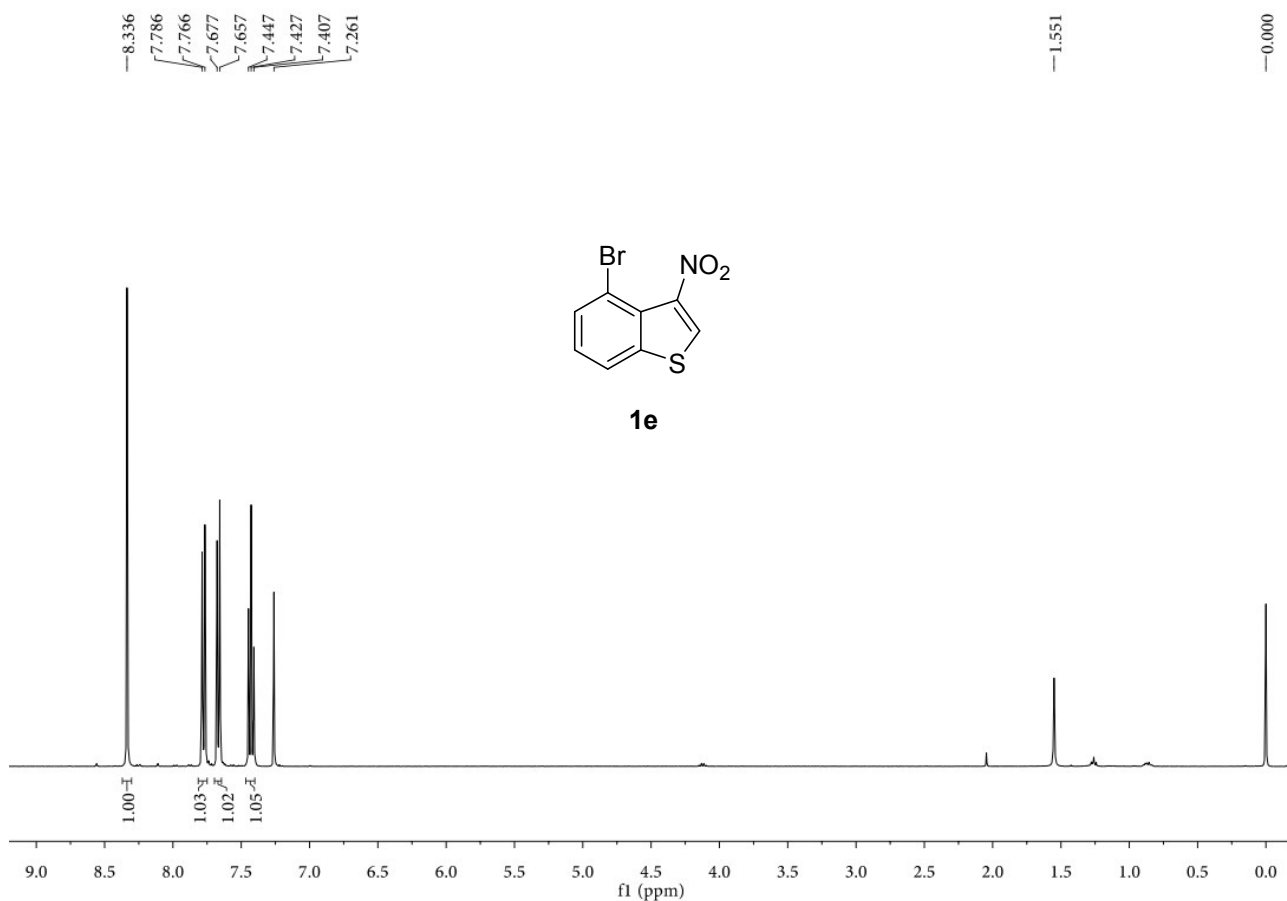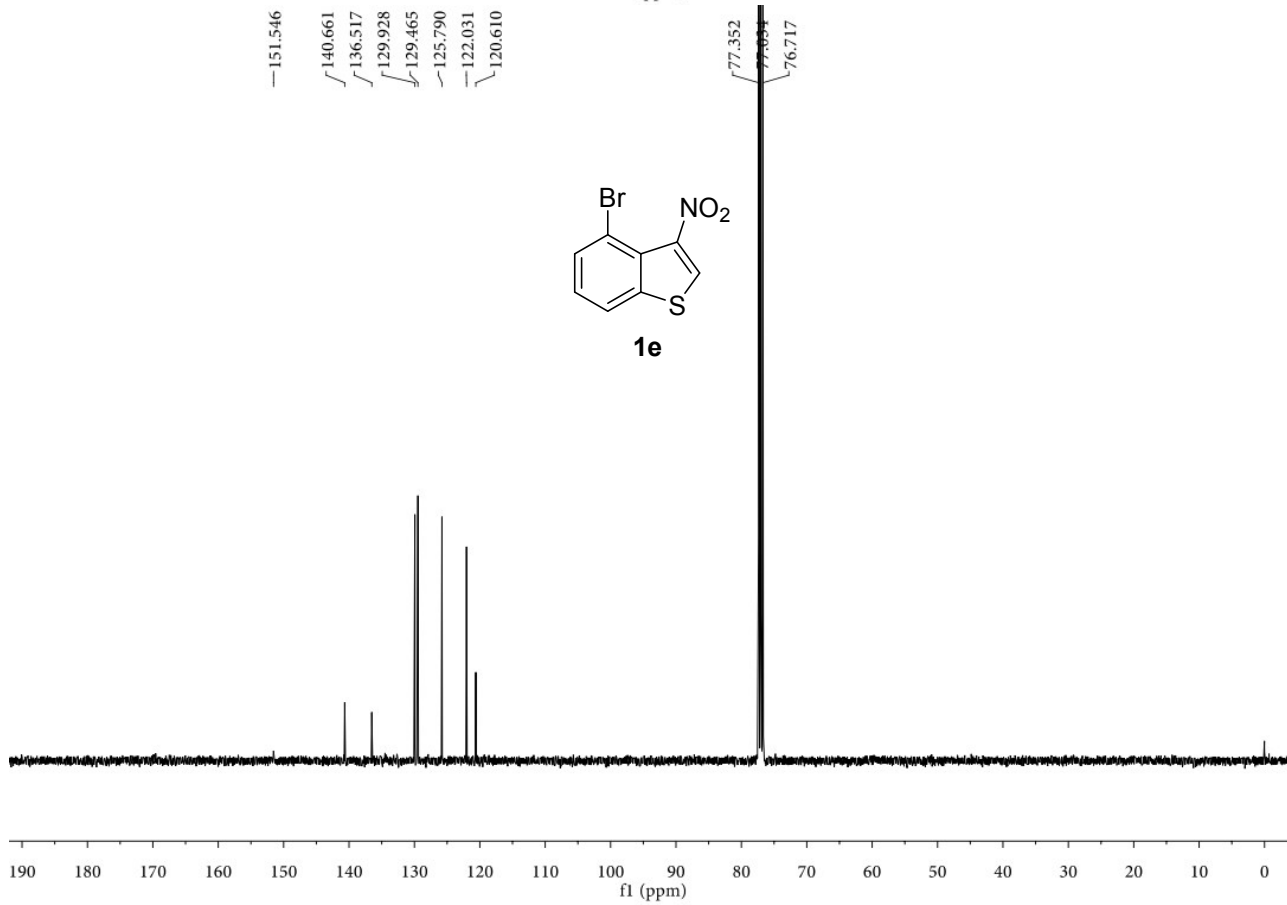

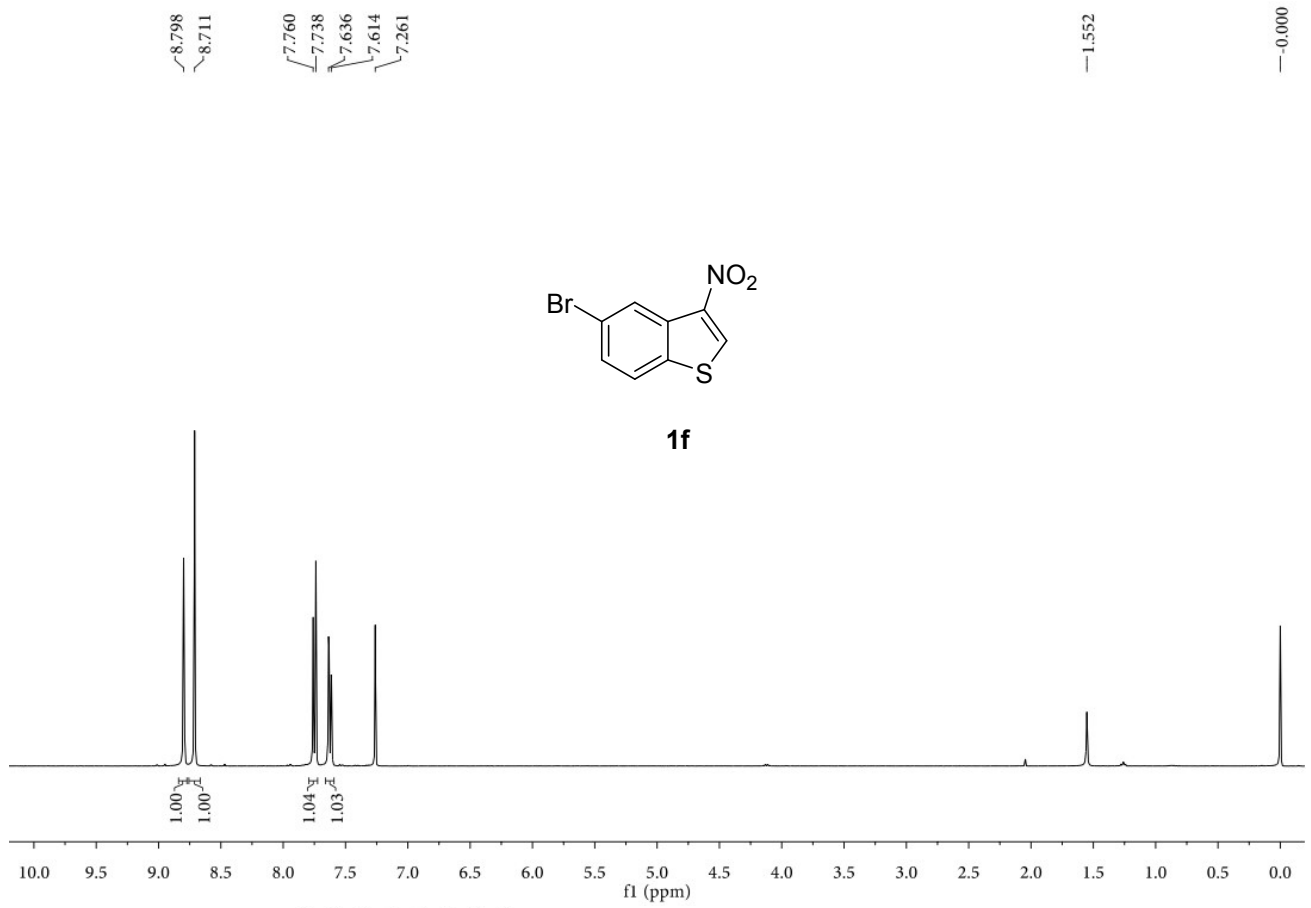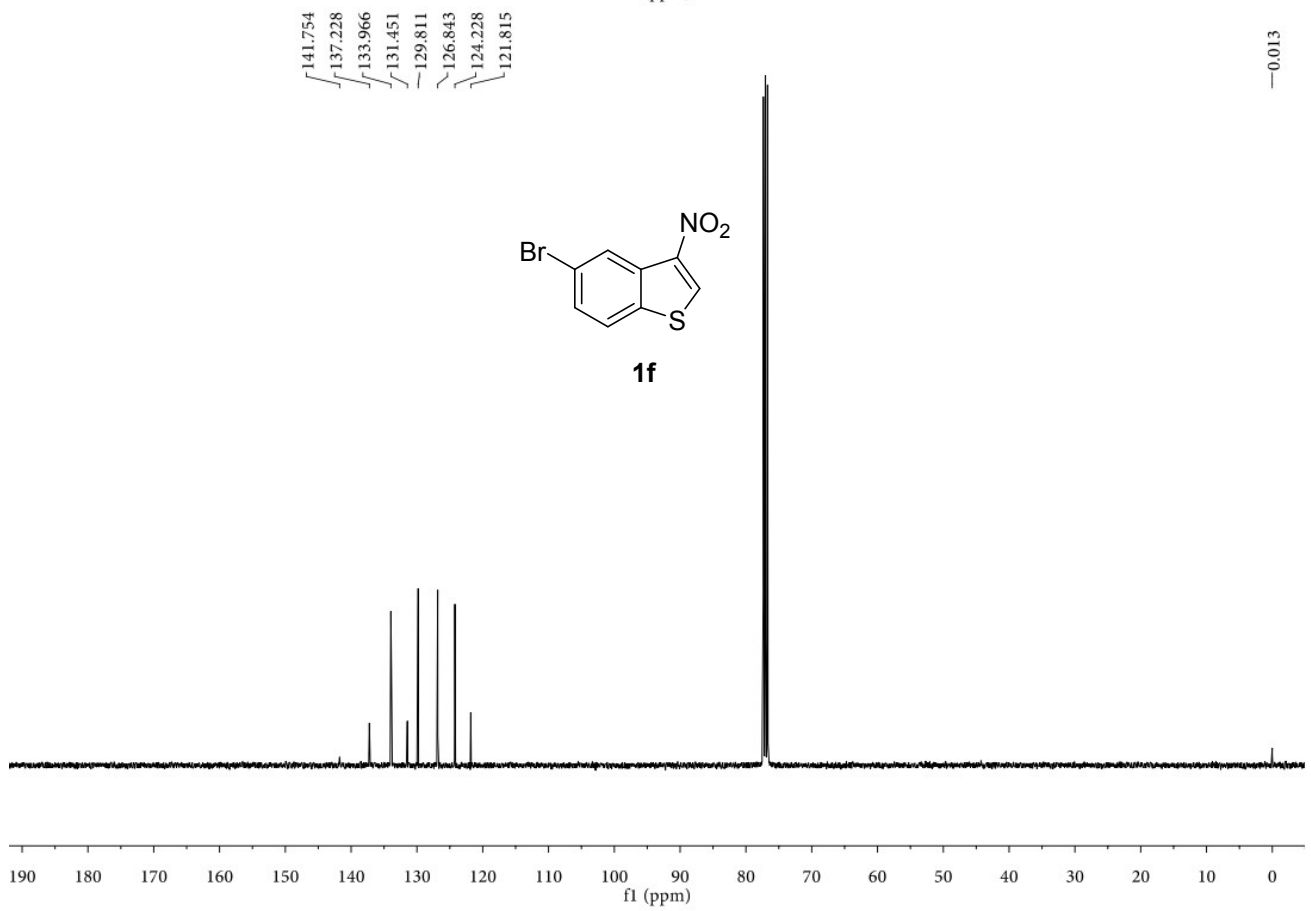

8.157  
7.847  
7.827  
7.744  
7.725  
7.348  
7.328  
7.308  
7.262

-1.589

-0.000

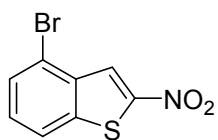

4a

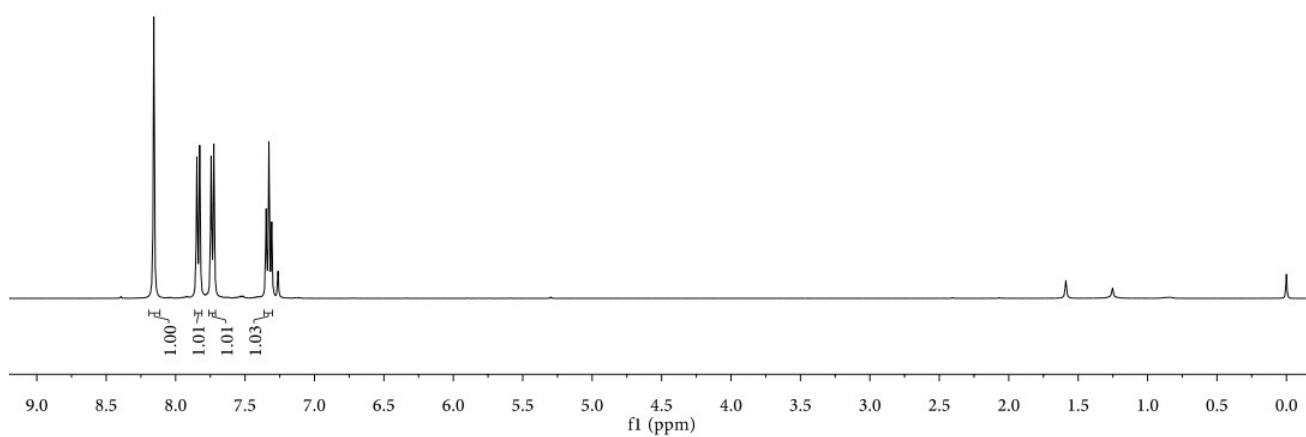

144.150  
140.399  
132.015  
128.478  
128.029  
127.088  
122.337  
115.628

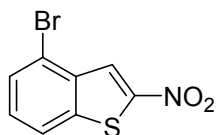

4a

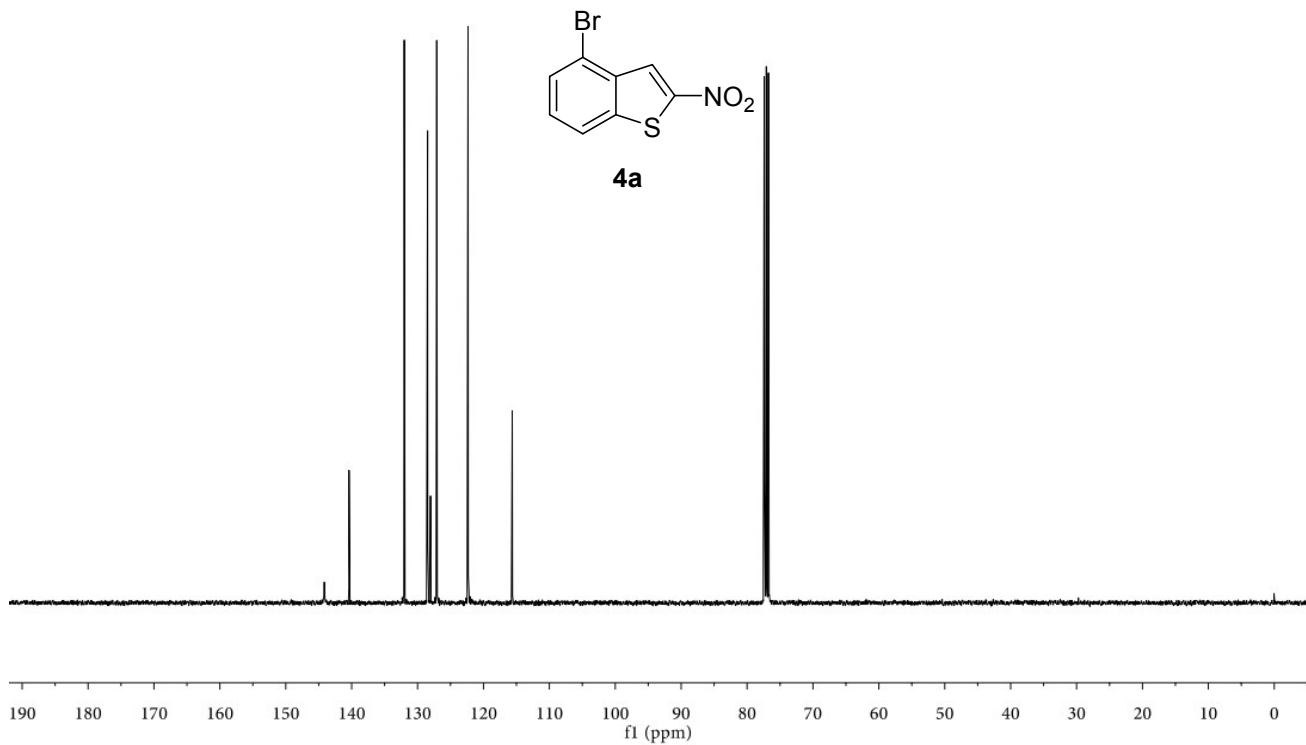

7.409  
7.390  
7.313  
7.294  
7.278  
7.275  
7.258  
7.243  
7.239  
7.198  
7.178  
7.140  
7.138  
7.120  
7.102  
7.100

5.007  
4.988  
4.970

3.998  
3.971  
3.685  
3.652  
3.606  
3.574  
3.461  
2.979  
2.953  
2.617  
2.598  
2.594  
2.575

-0.000

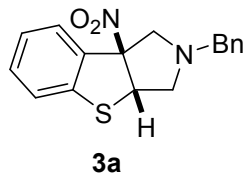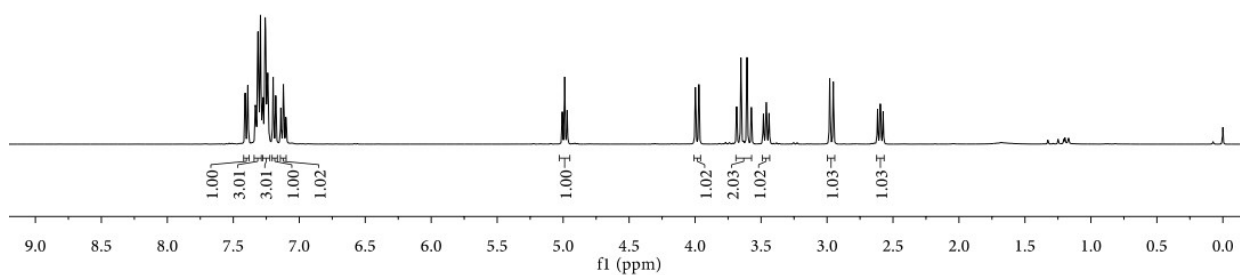

142.875  
137.248  
135.111  
131.307  
128.555  
128.518  
127.509  
125.566  
125.158  
122.477

107.089

64.546  
63.207  
58.635  
52.427

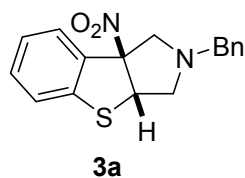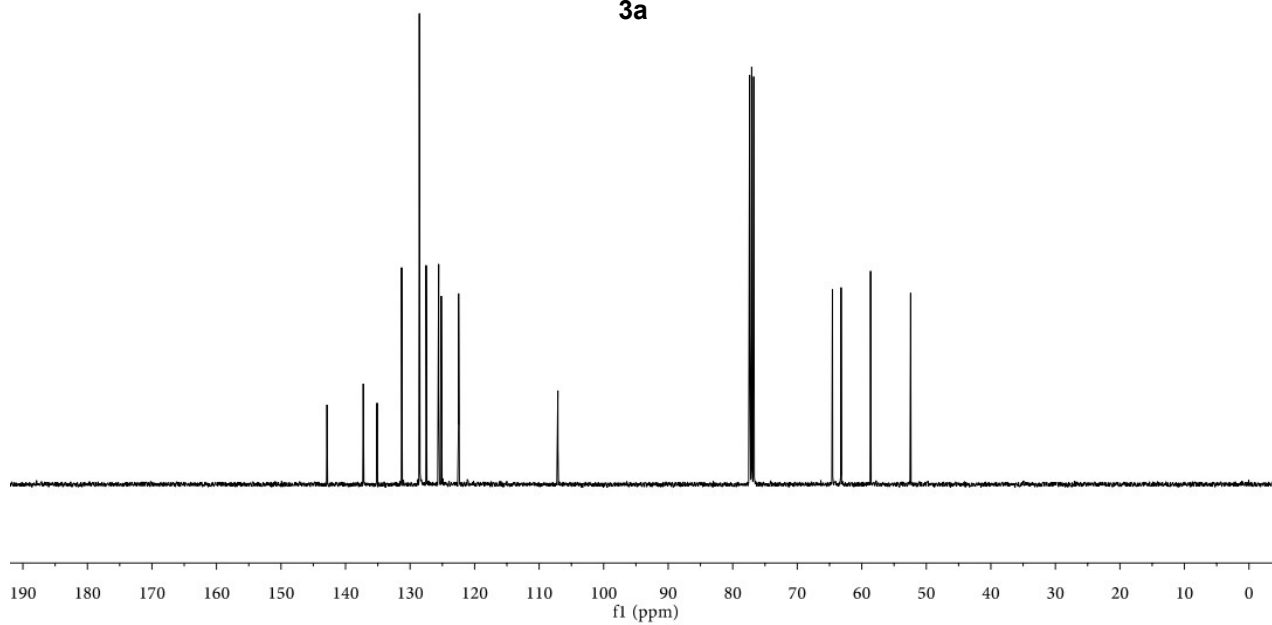

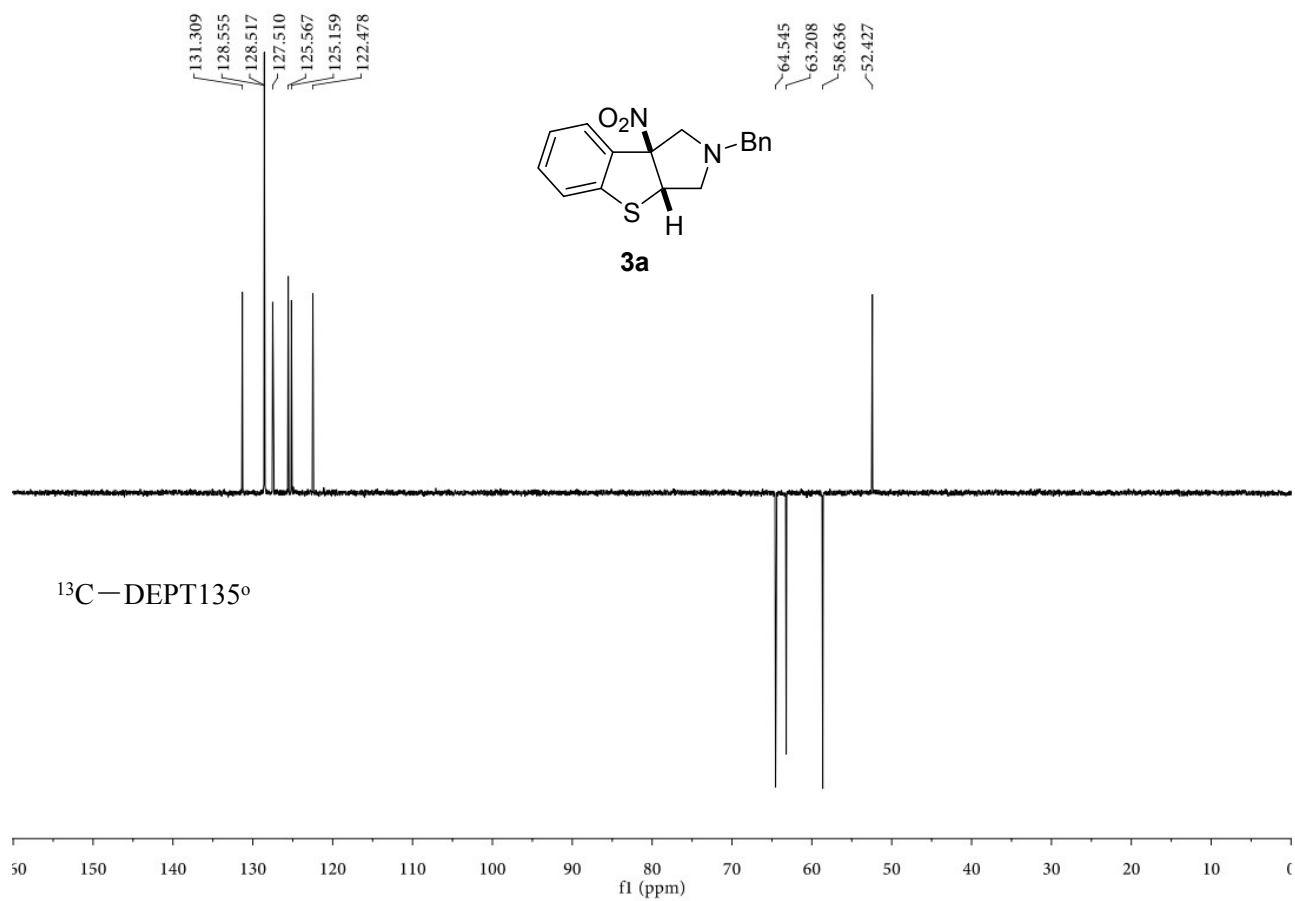

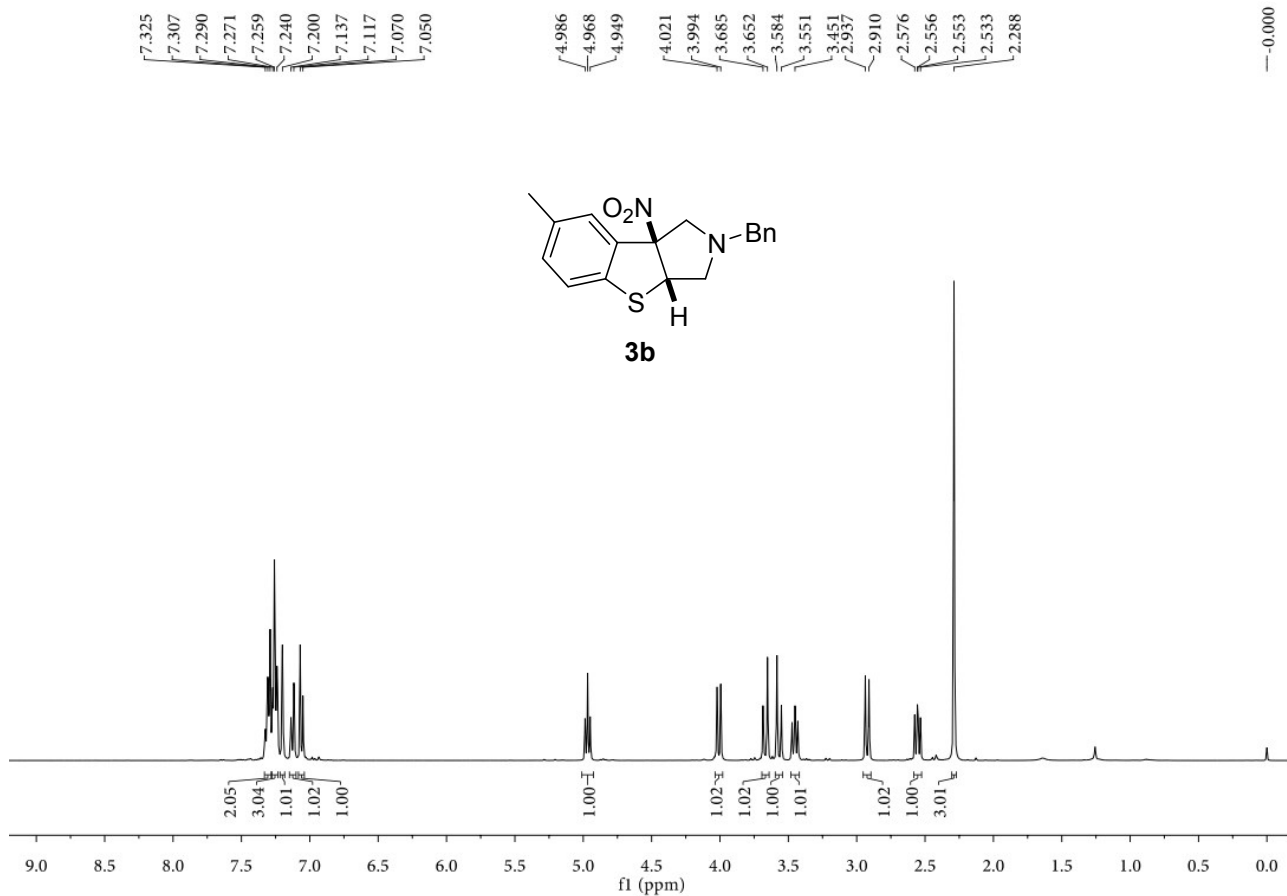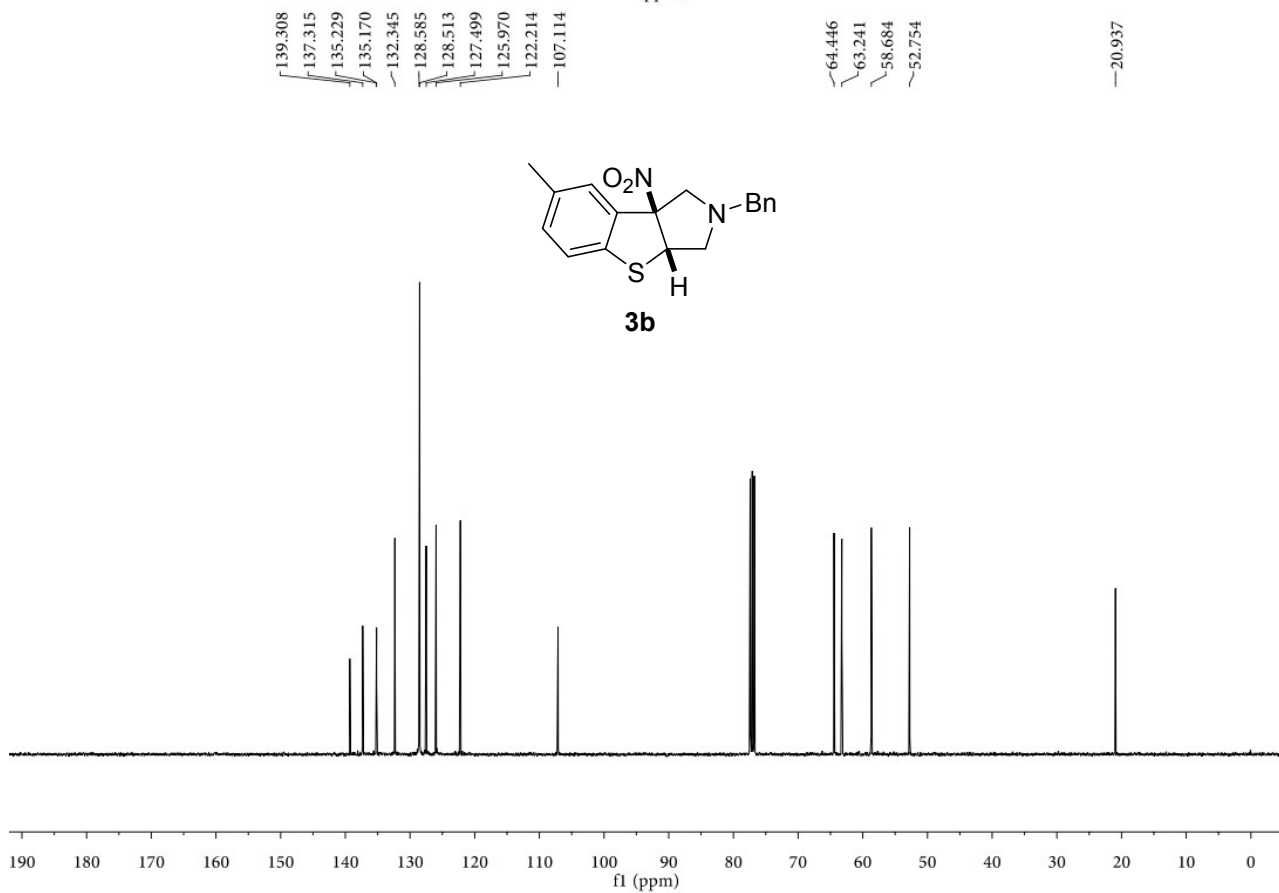





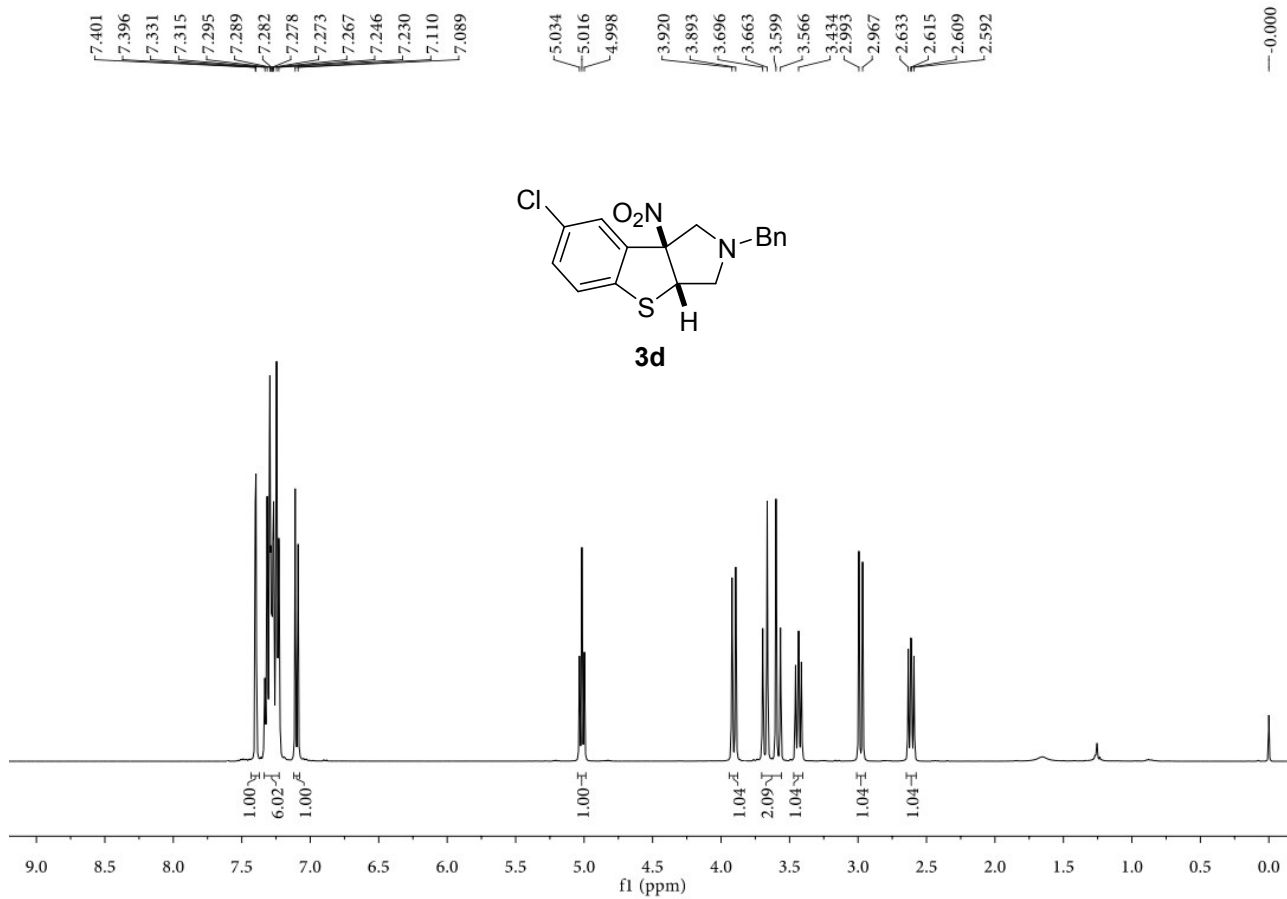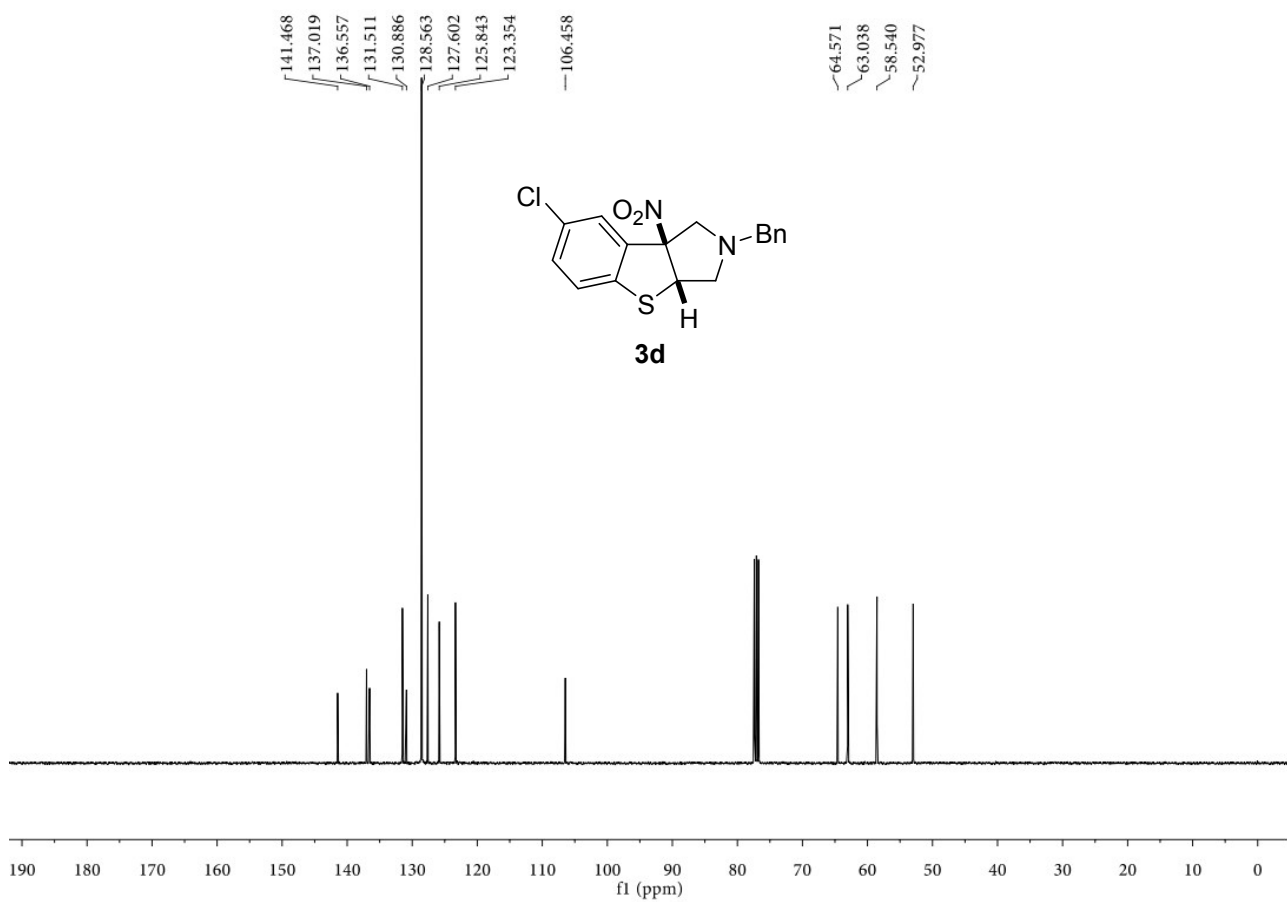

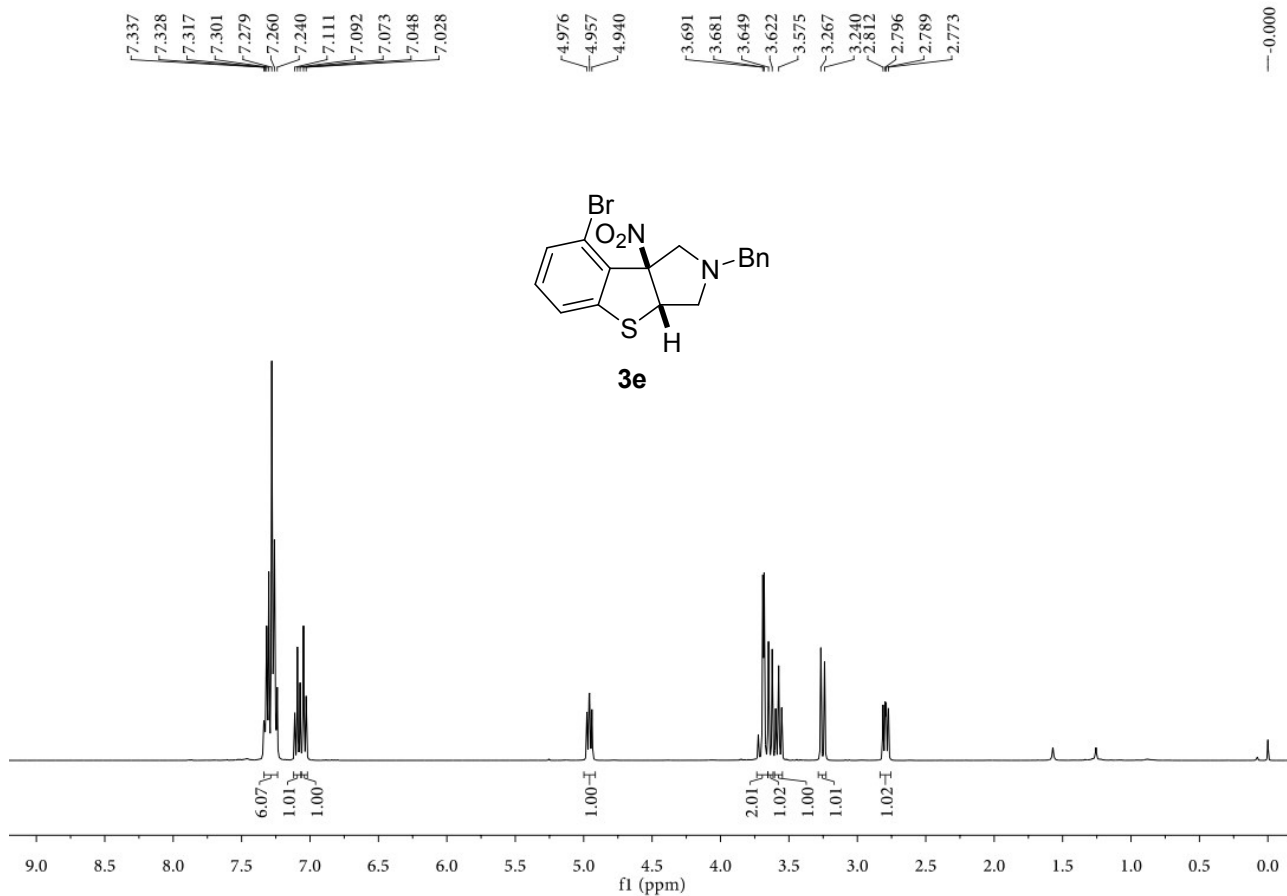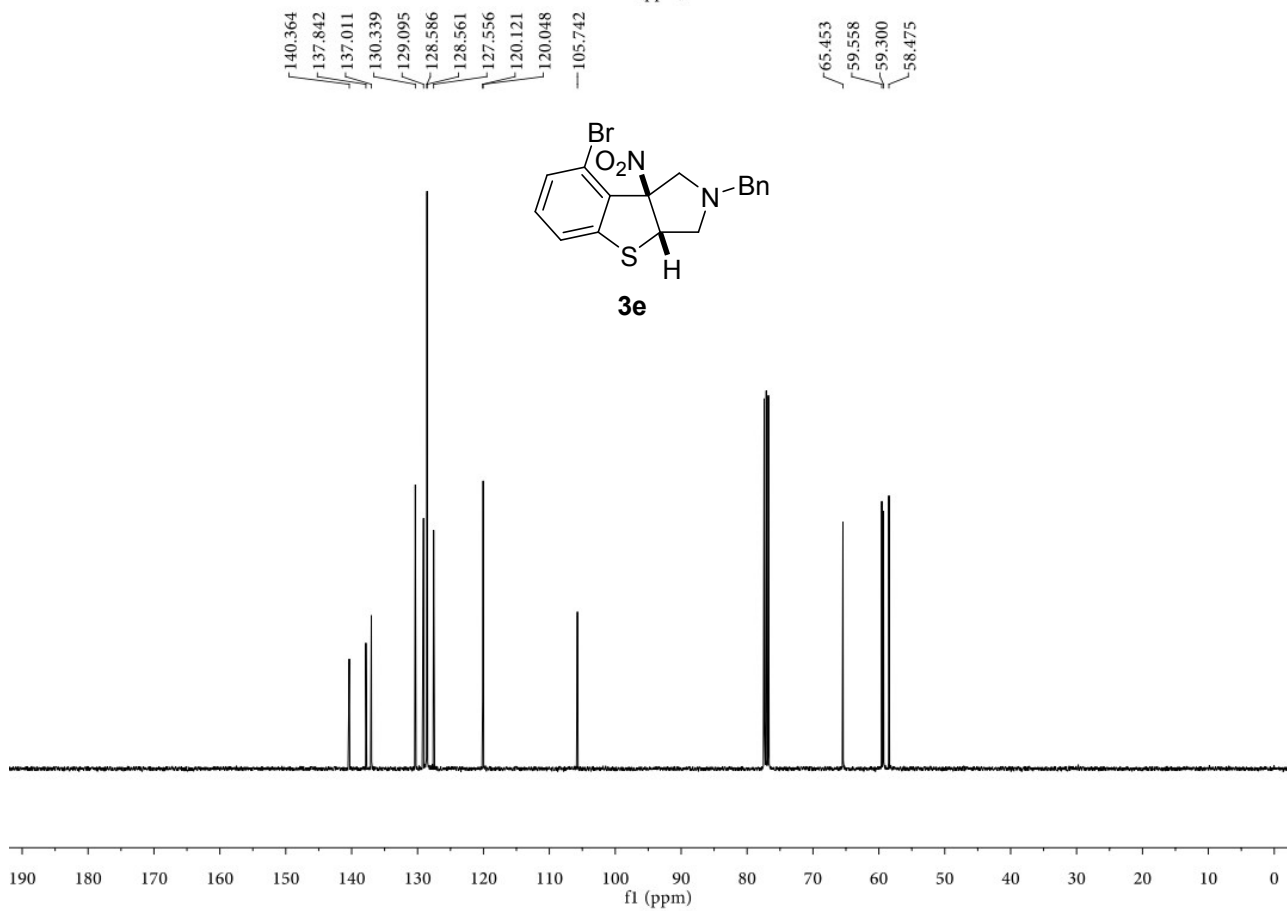

7.543  
7.539  
7.431  
7.426  
7.410  
7.405  
7.333  
7.316  
7.298  
7.283  
7.267  
7.246  
7.230  
7.059  
7.038

5.022  
5.004  
4.986

3.922  
3.895  
3.699  
3.667  
3.596  
3.563  
3.433  
2.993  
2.966  
2.629  
2.611  
2.605  
2.588

-0.000

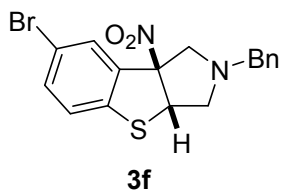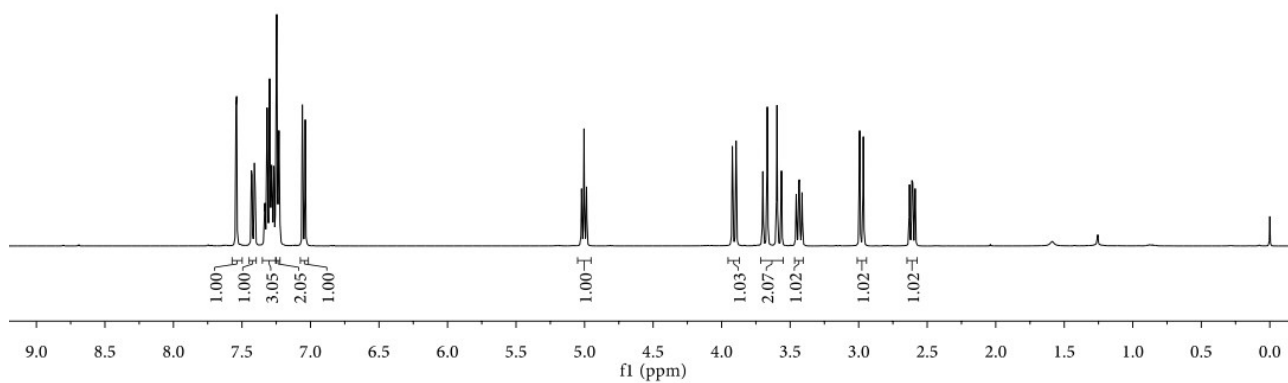

142.147  
137.010  
136.896  
134.314  
128.712  
128.563  
127.604  
123.745  
118.170  
106.404  
64.583  
63.018  
58.532  
52.901

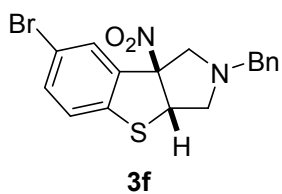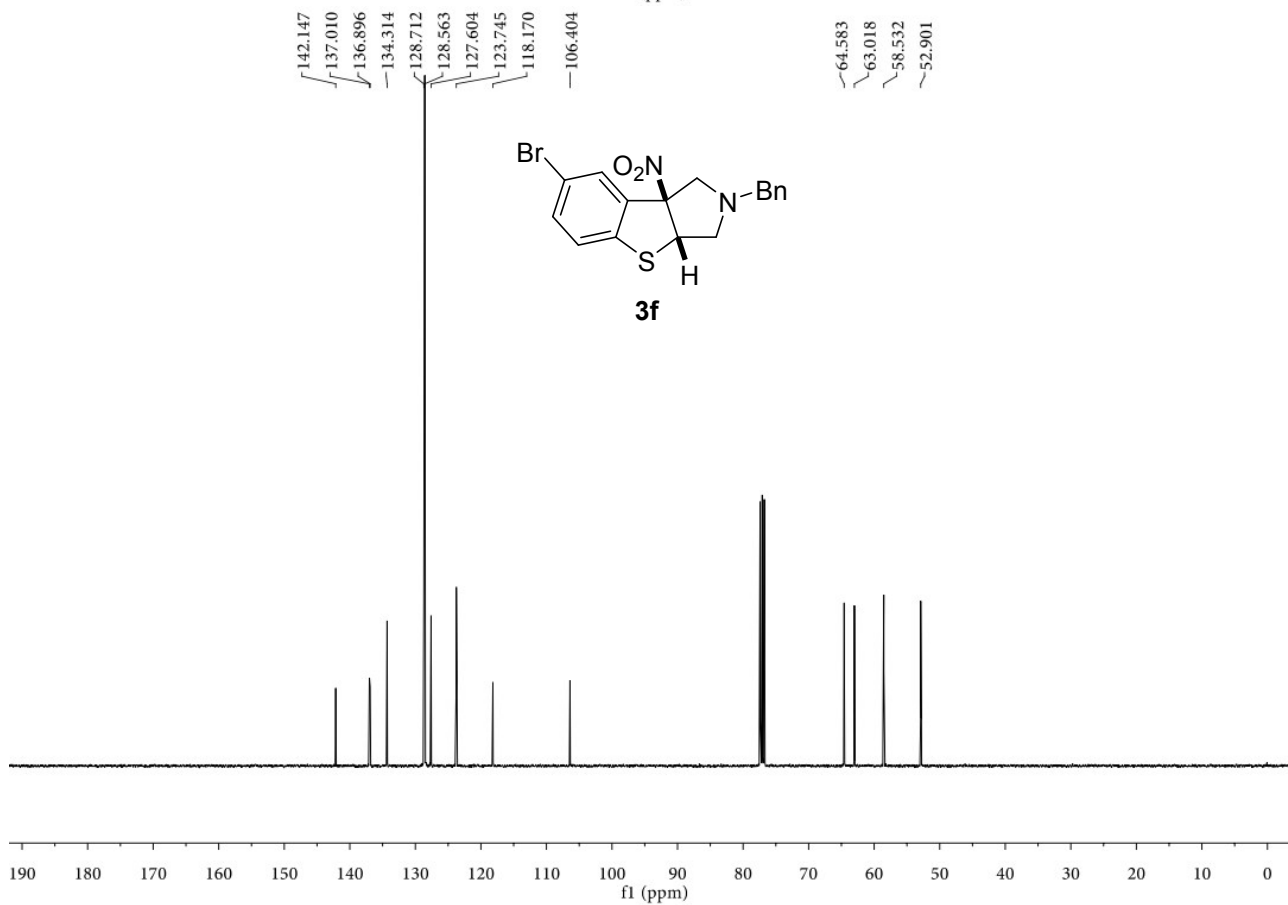

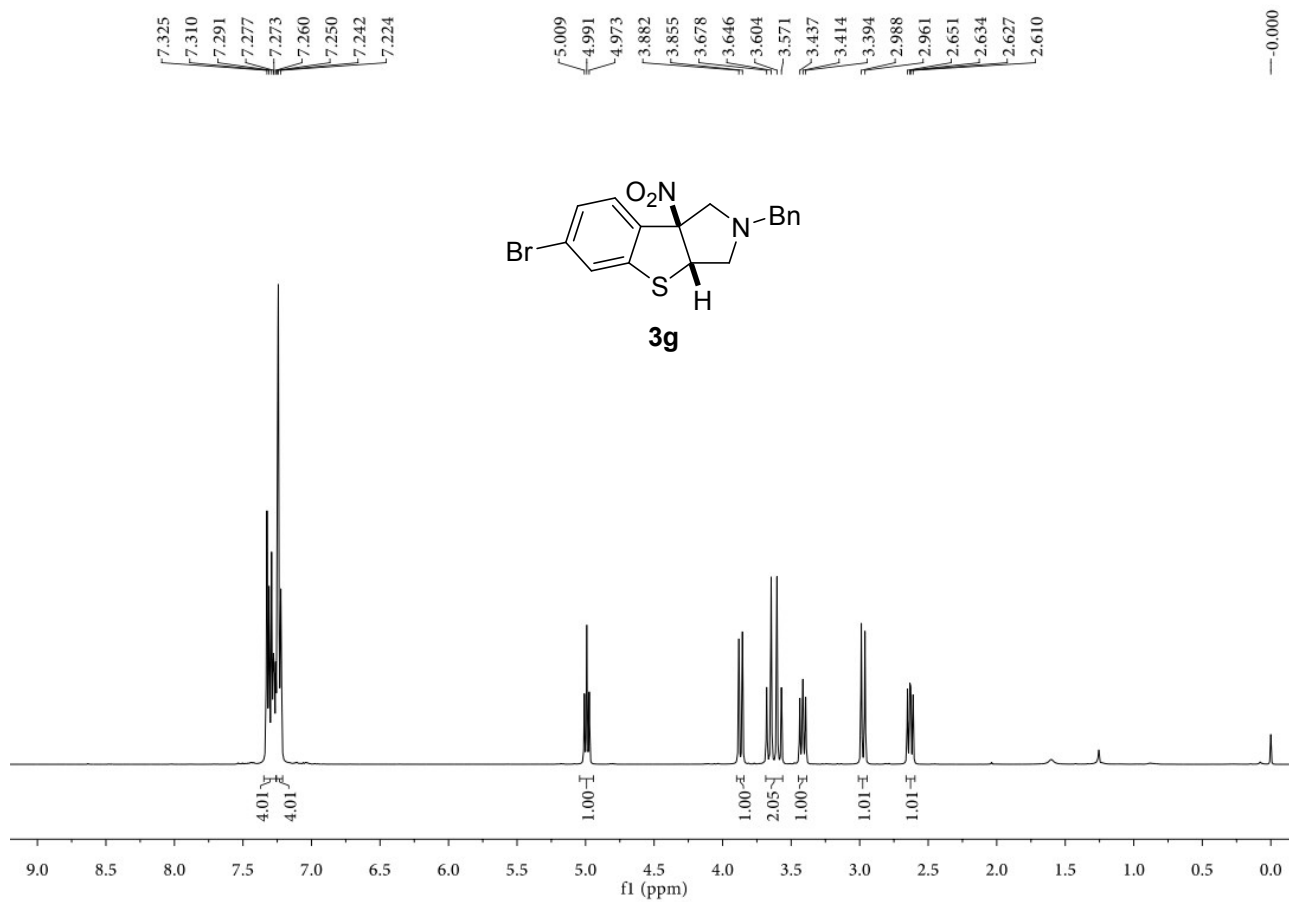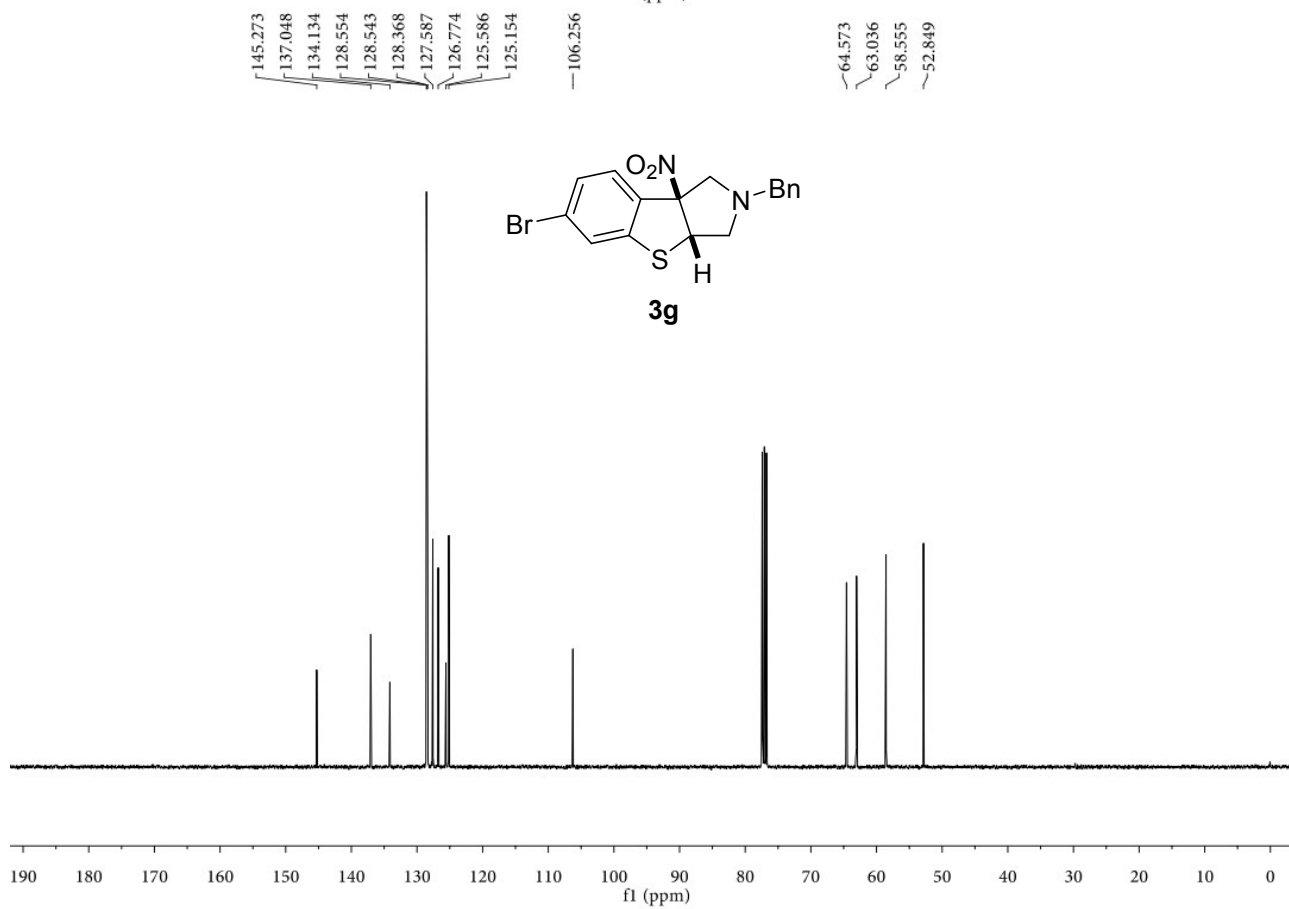

7.484  
7.464  
7.363  
7.344  
7.327  
7.311  
7.292  
7.279  
7.262  
7.244  
7.227  
7.021  
7.002  
6.982

4.987  
4.969  
4.951

3.925  
3.898  
3.680  
3.648  
3.615  
3.582  
3.451  
2.986  
2.959

2.682  
2.665  
2.659  
2.641

—0.000

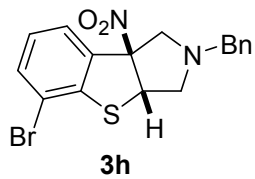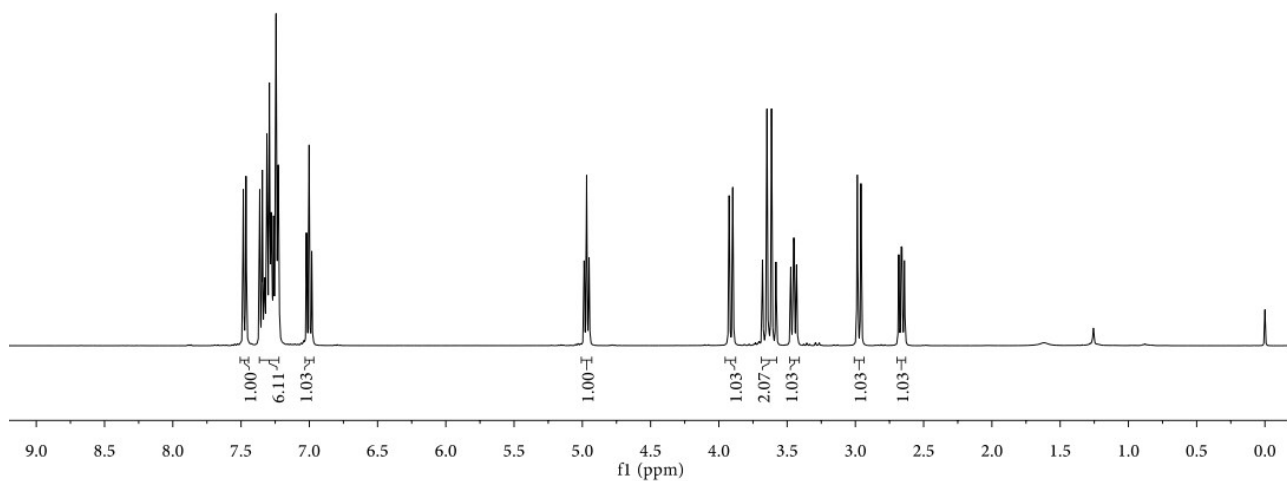

145.271  
137.047  
136.067  
134.107  
128.557  
127.582  
126.635  
124.267  
115.997  
108.041

64.700  
63.033  
58.529  
51.334

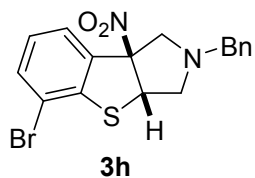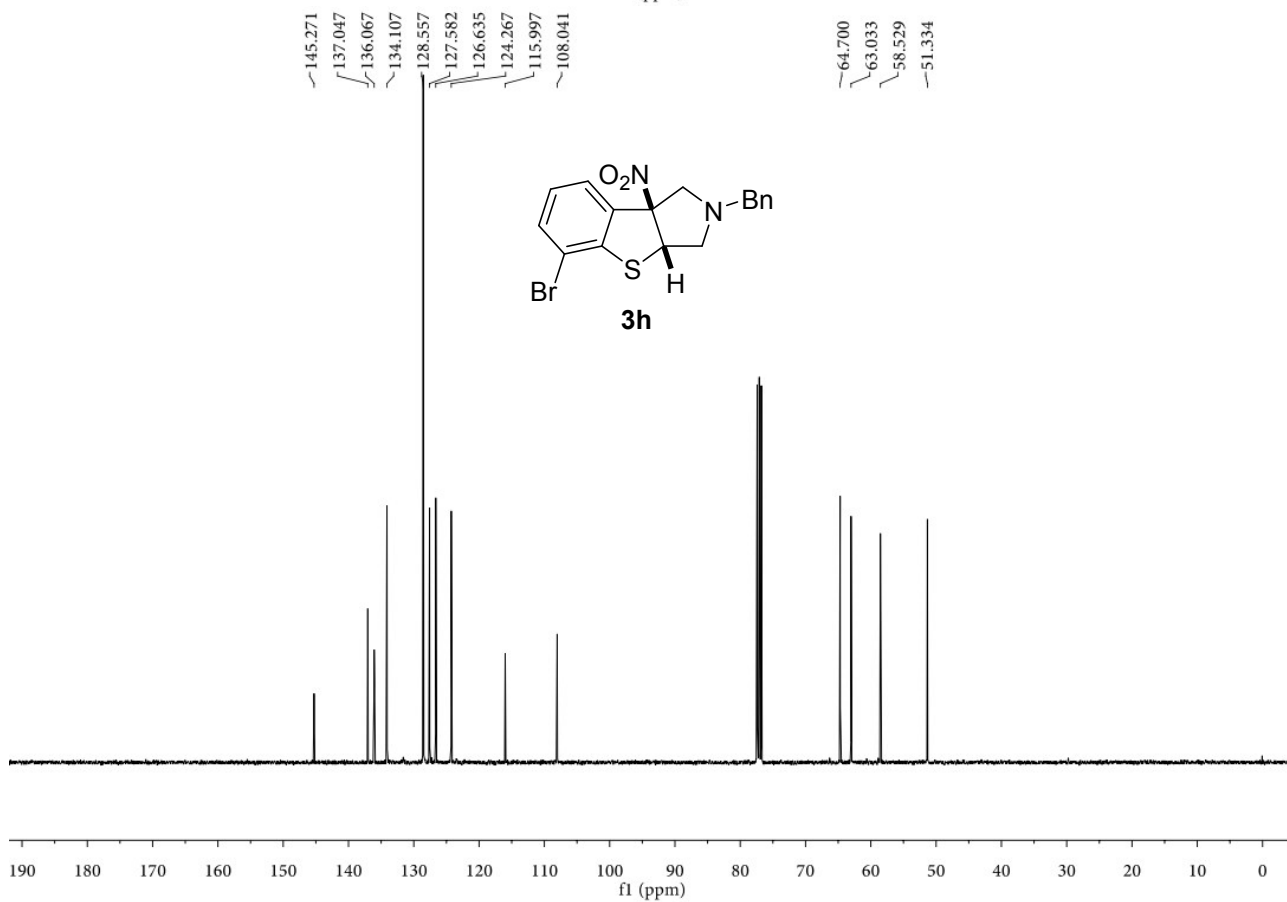

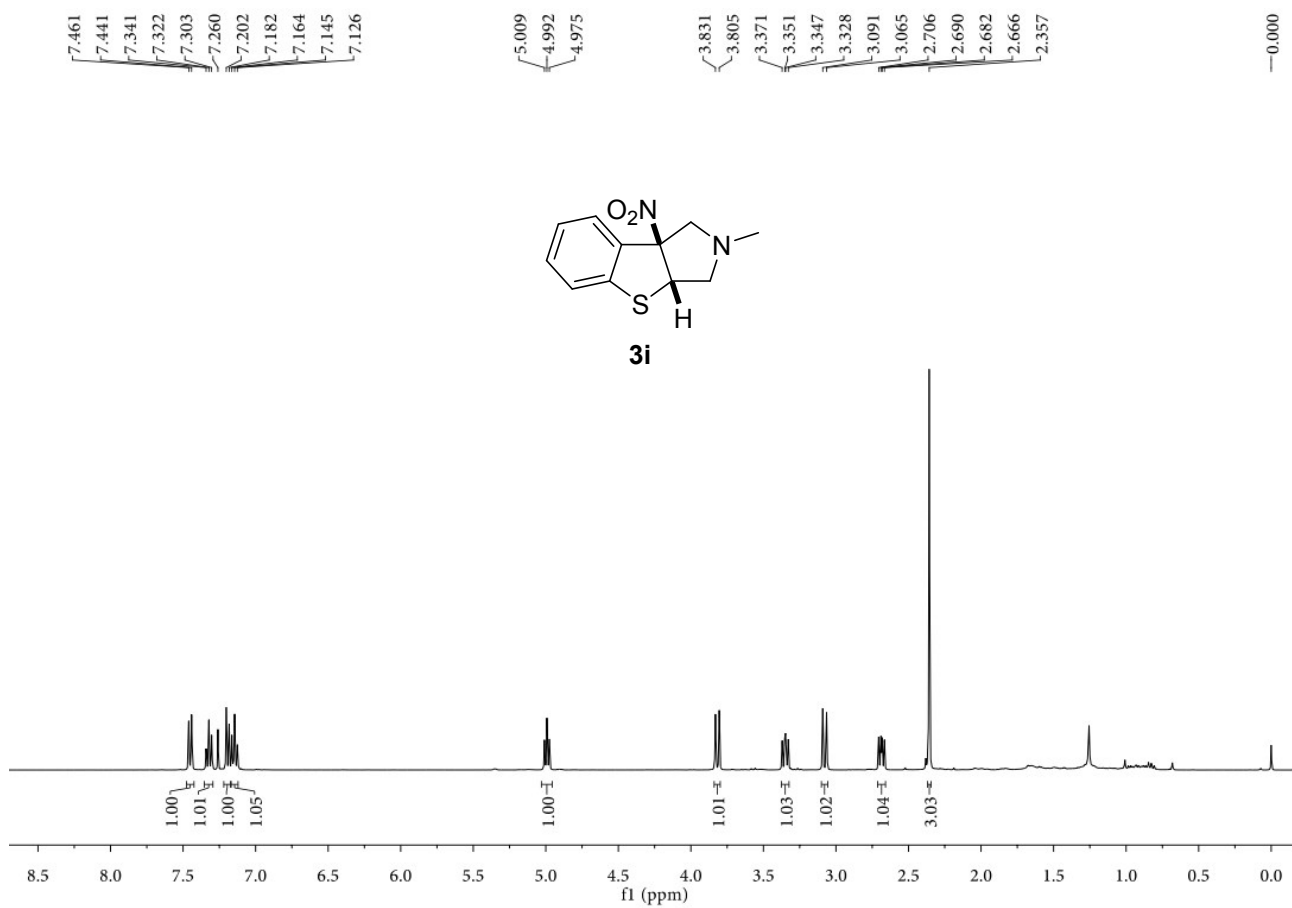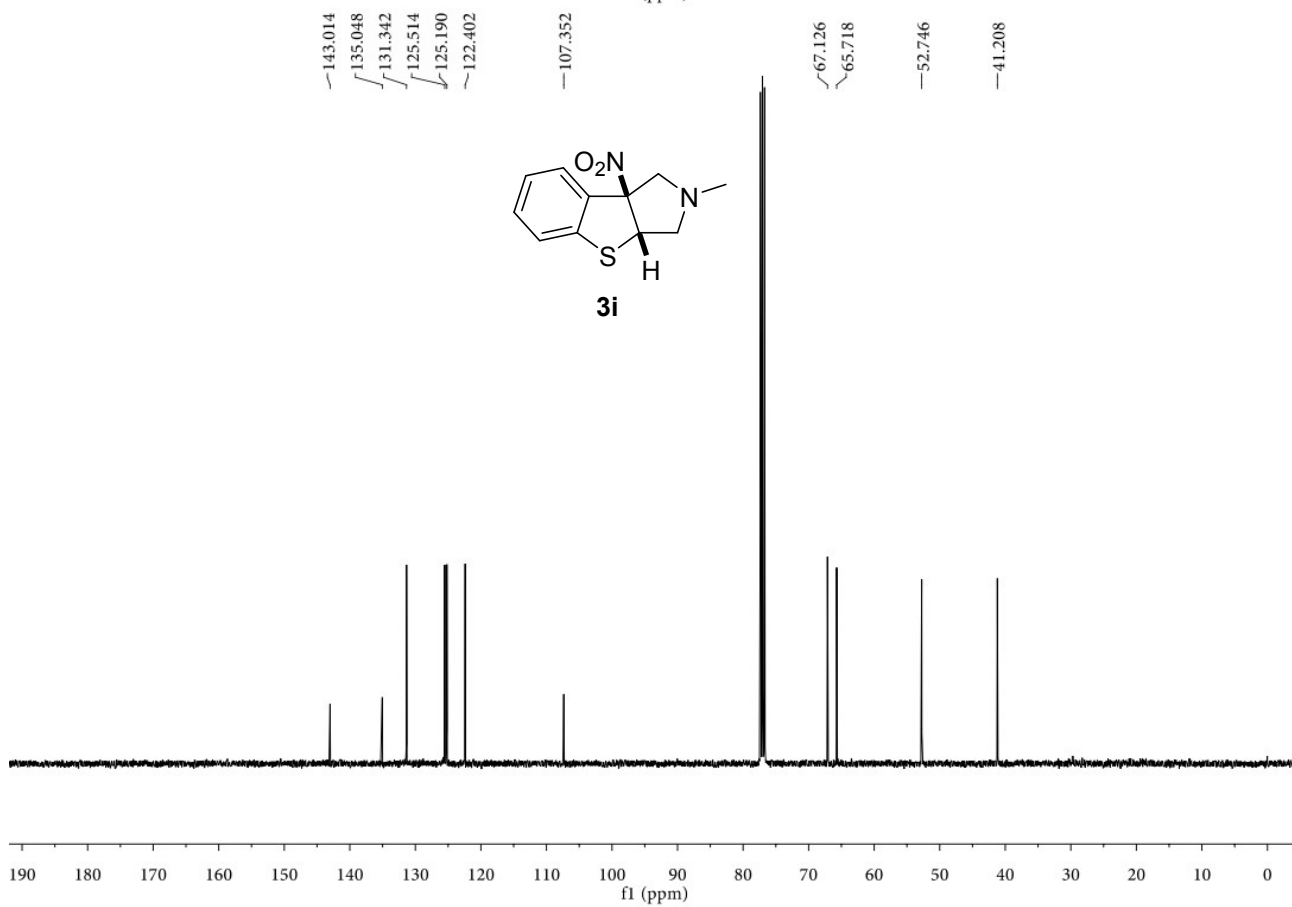

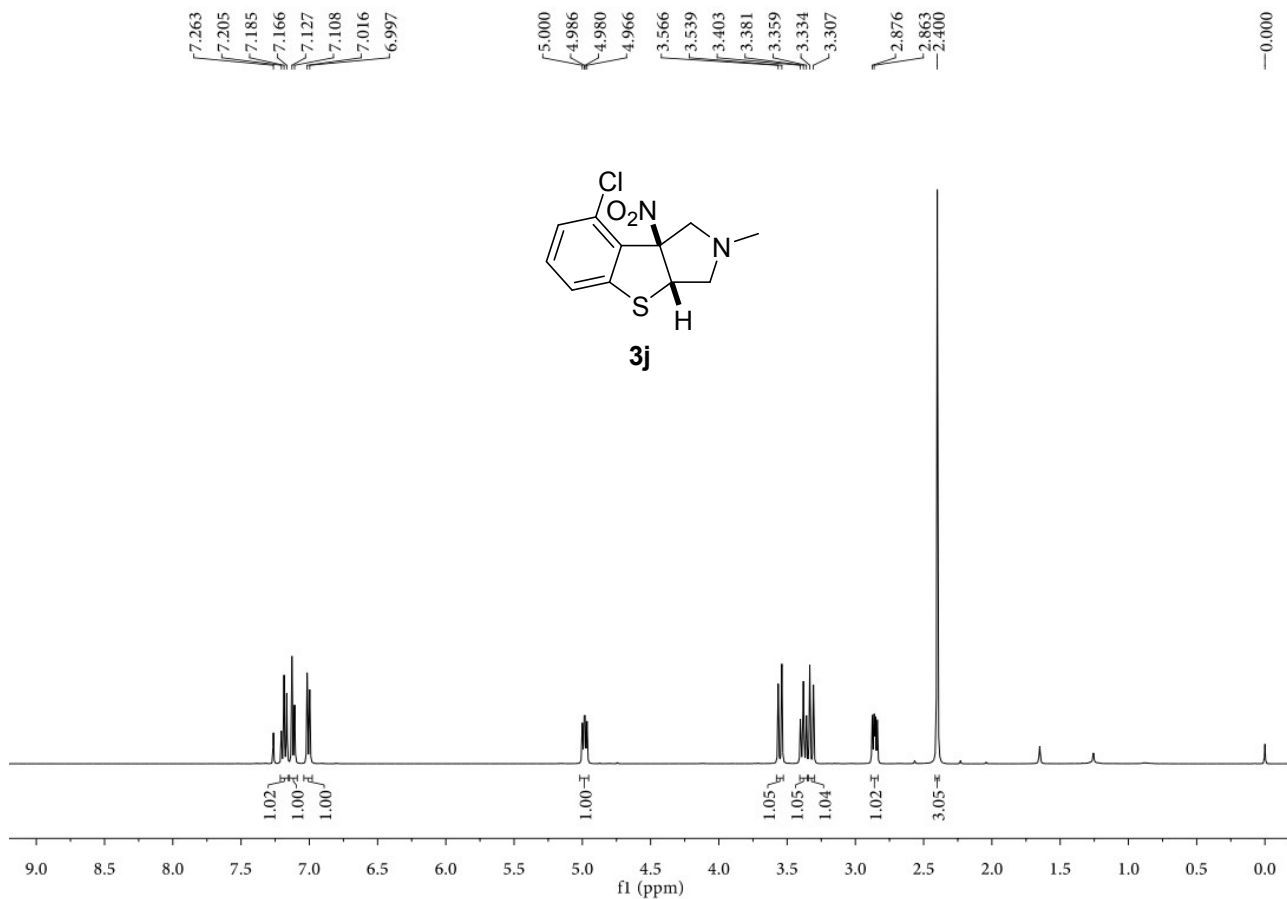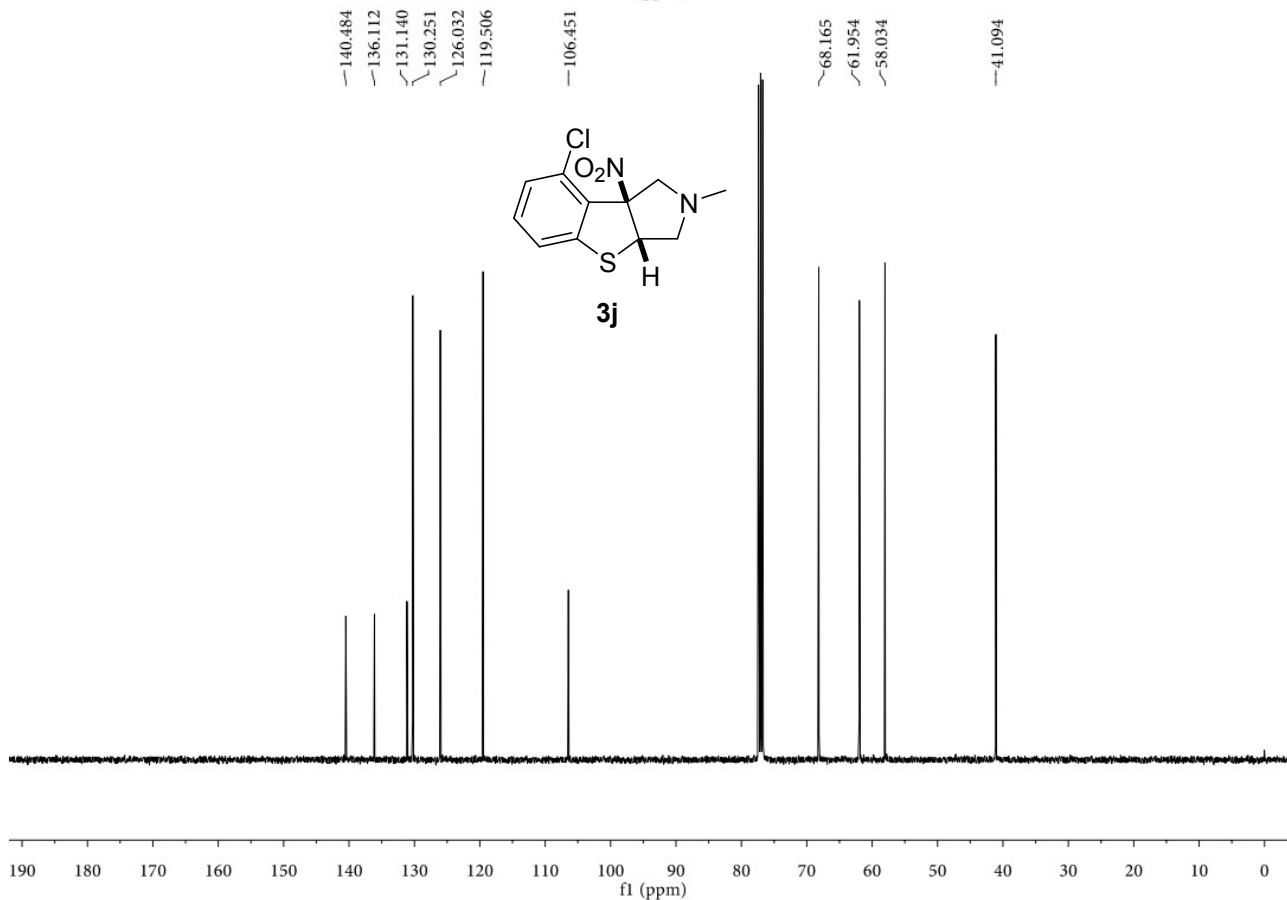



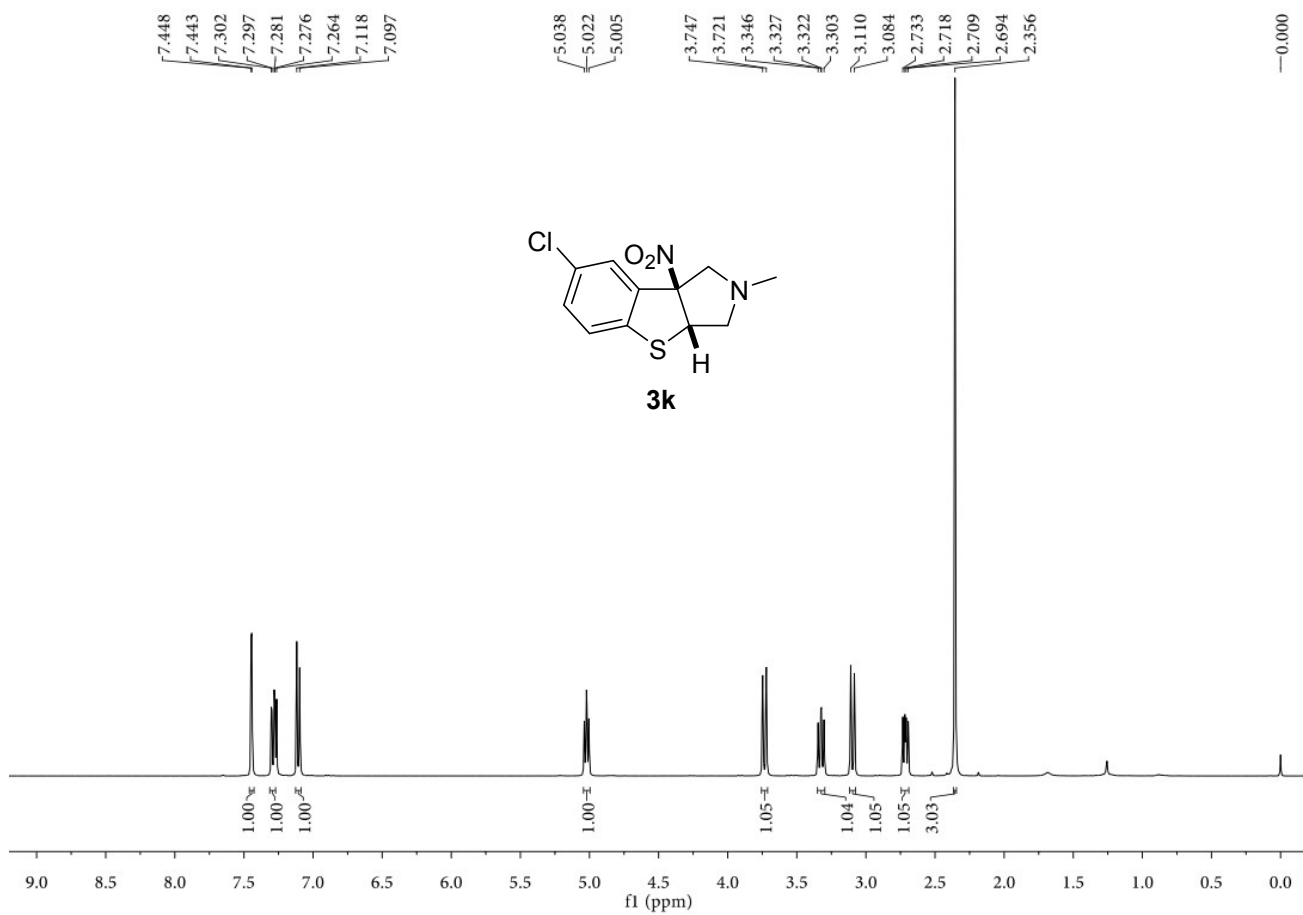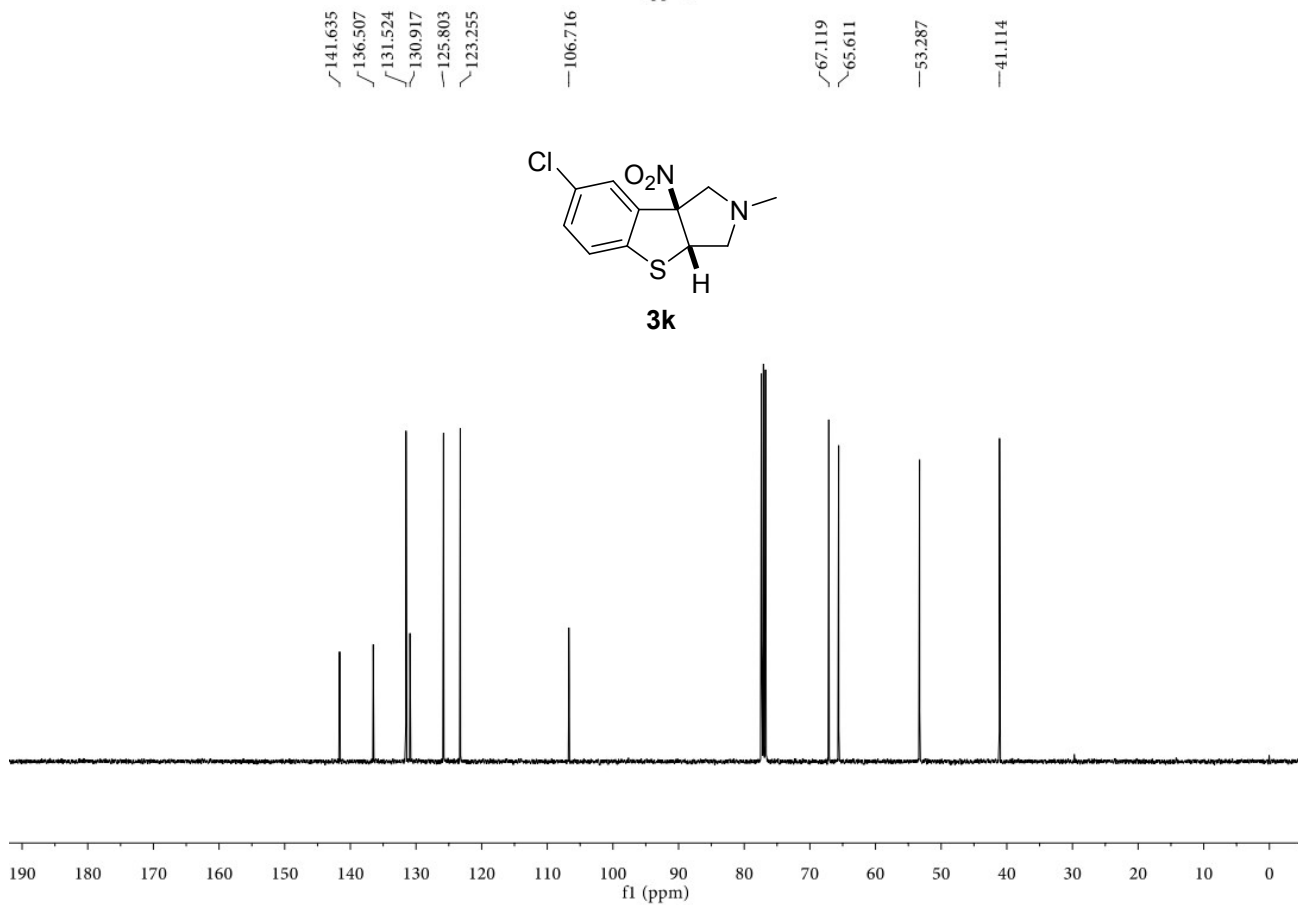

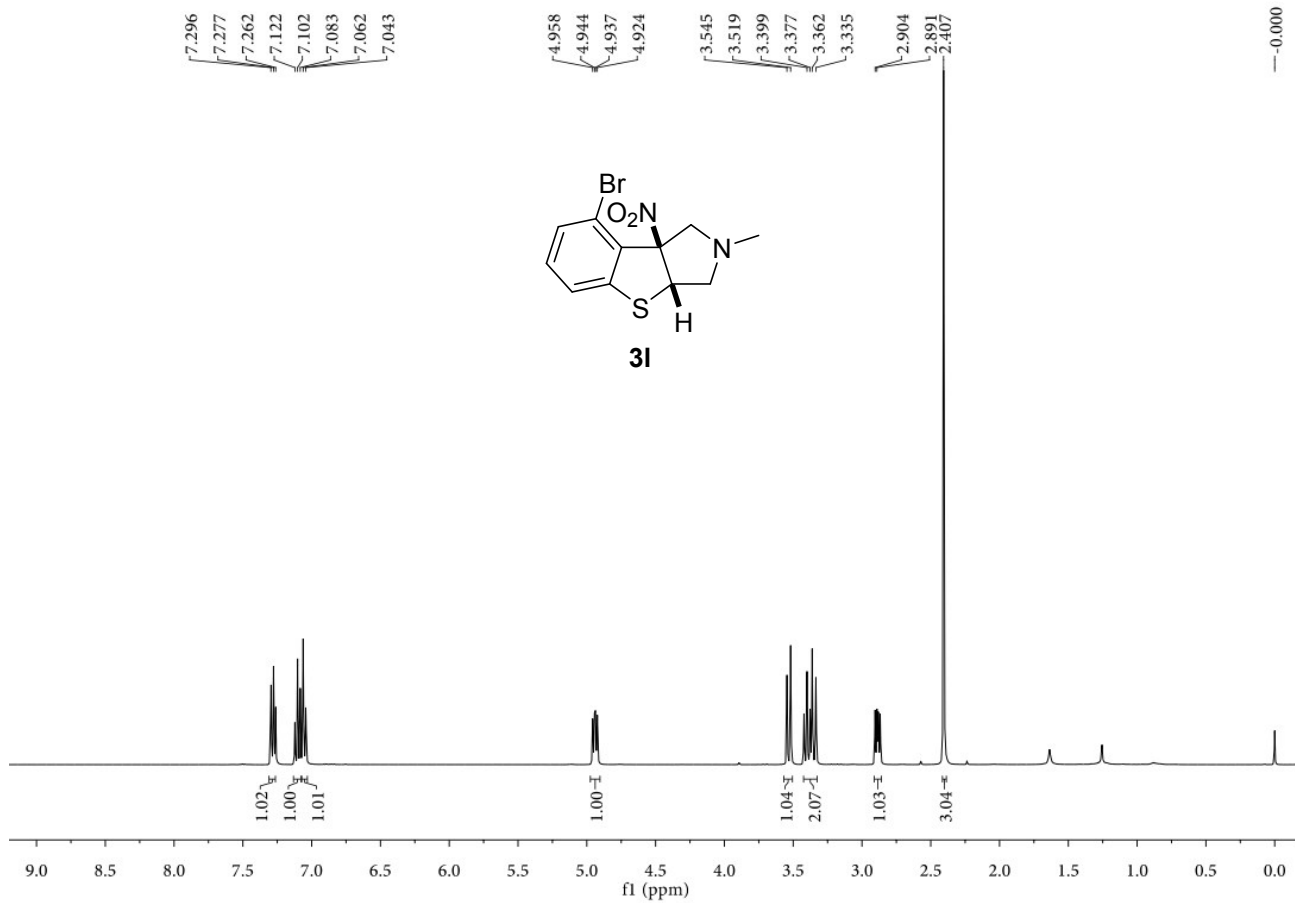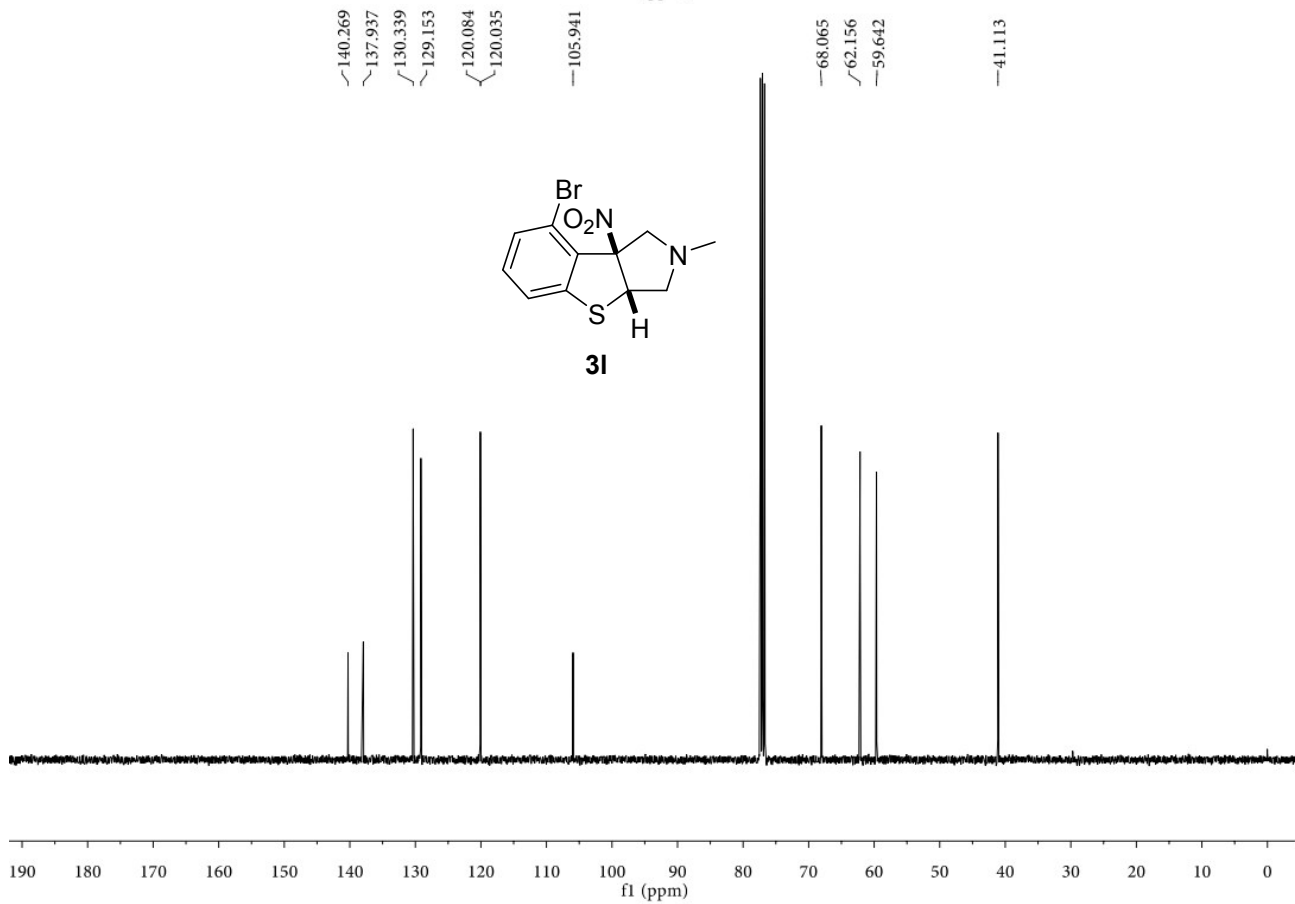

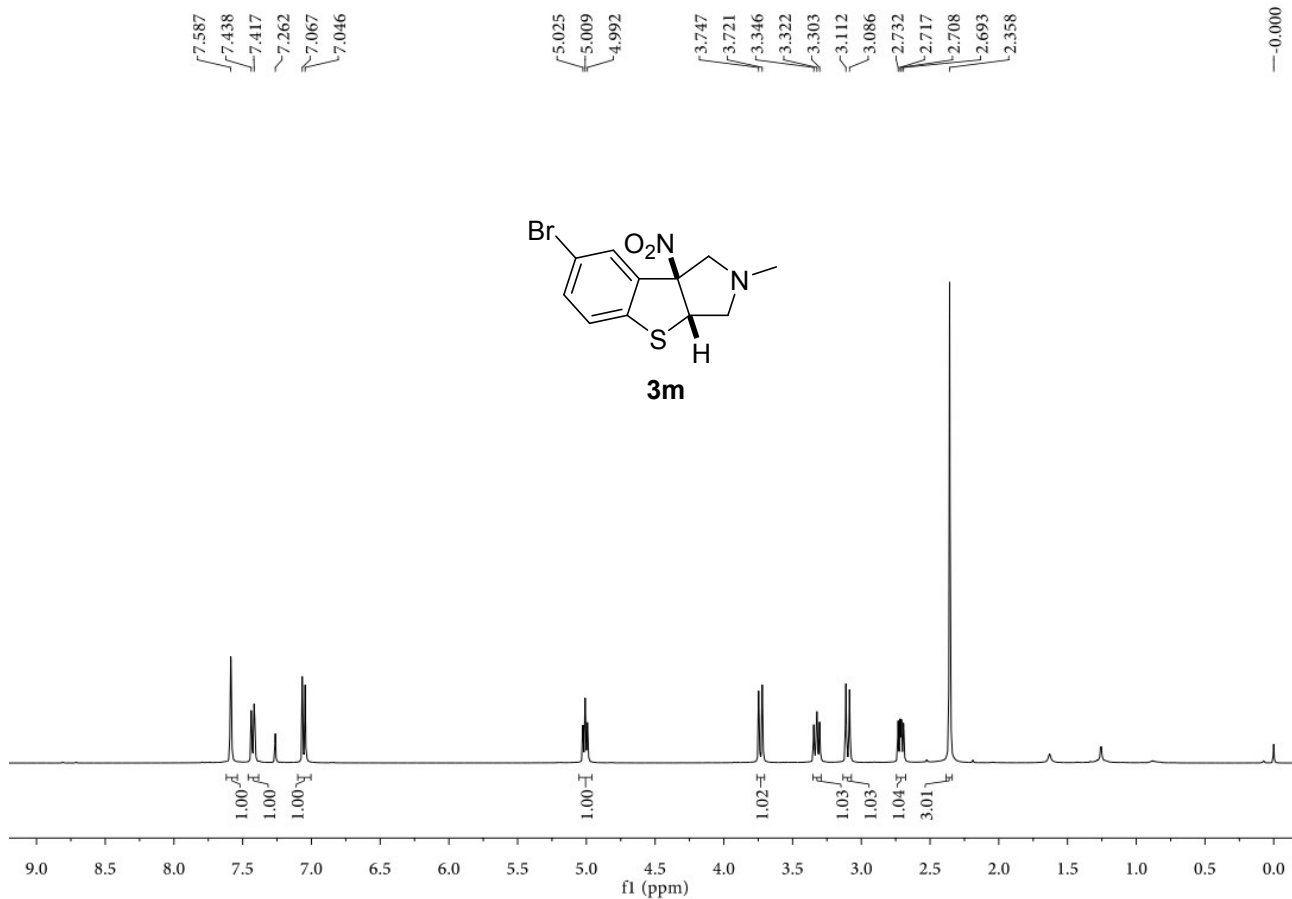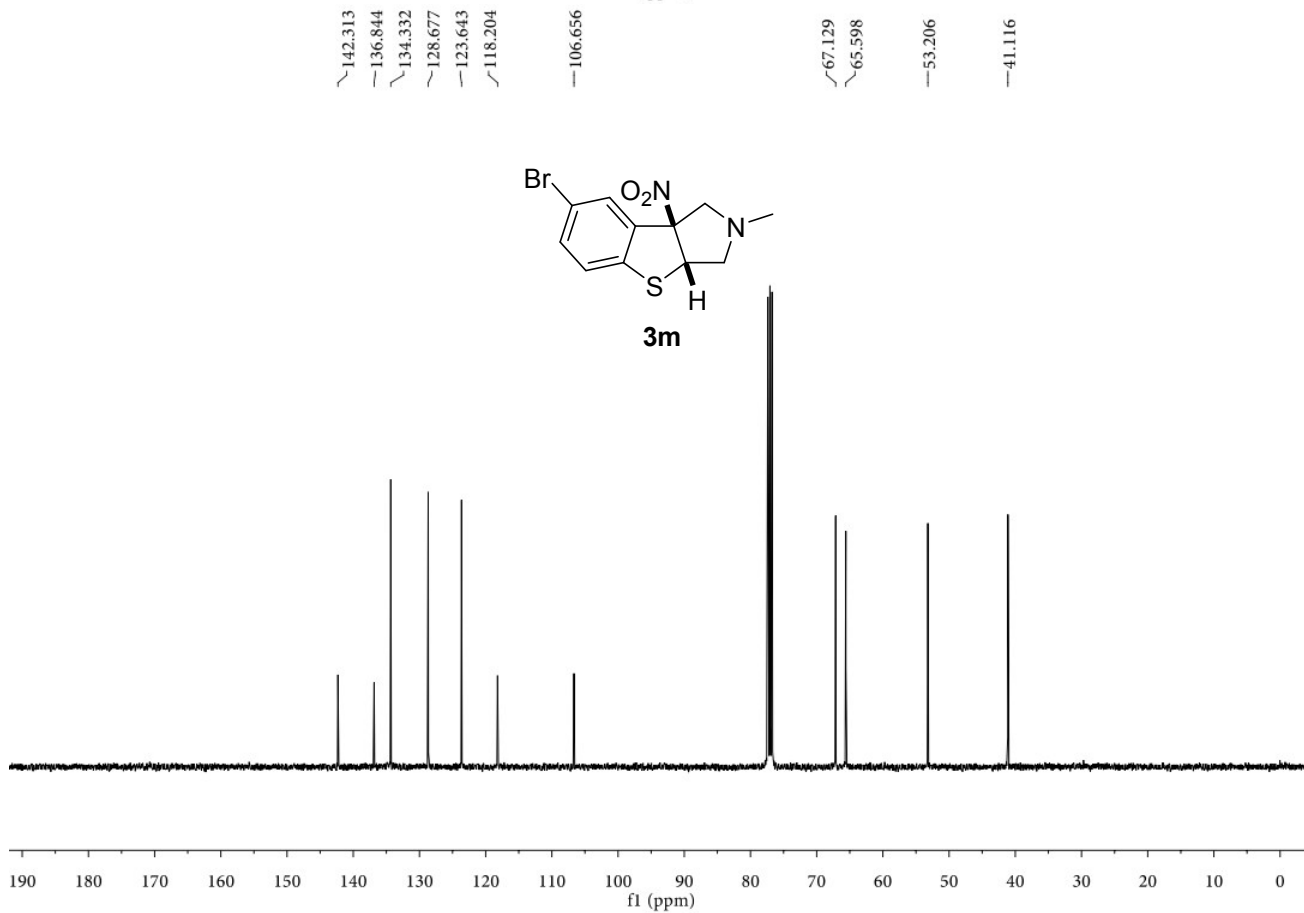

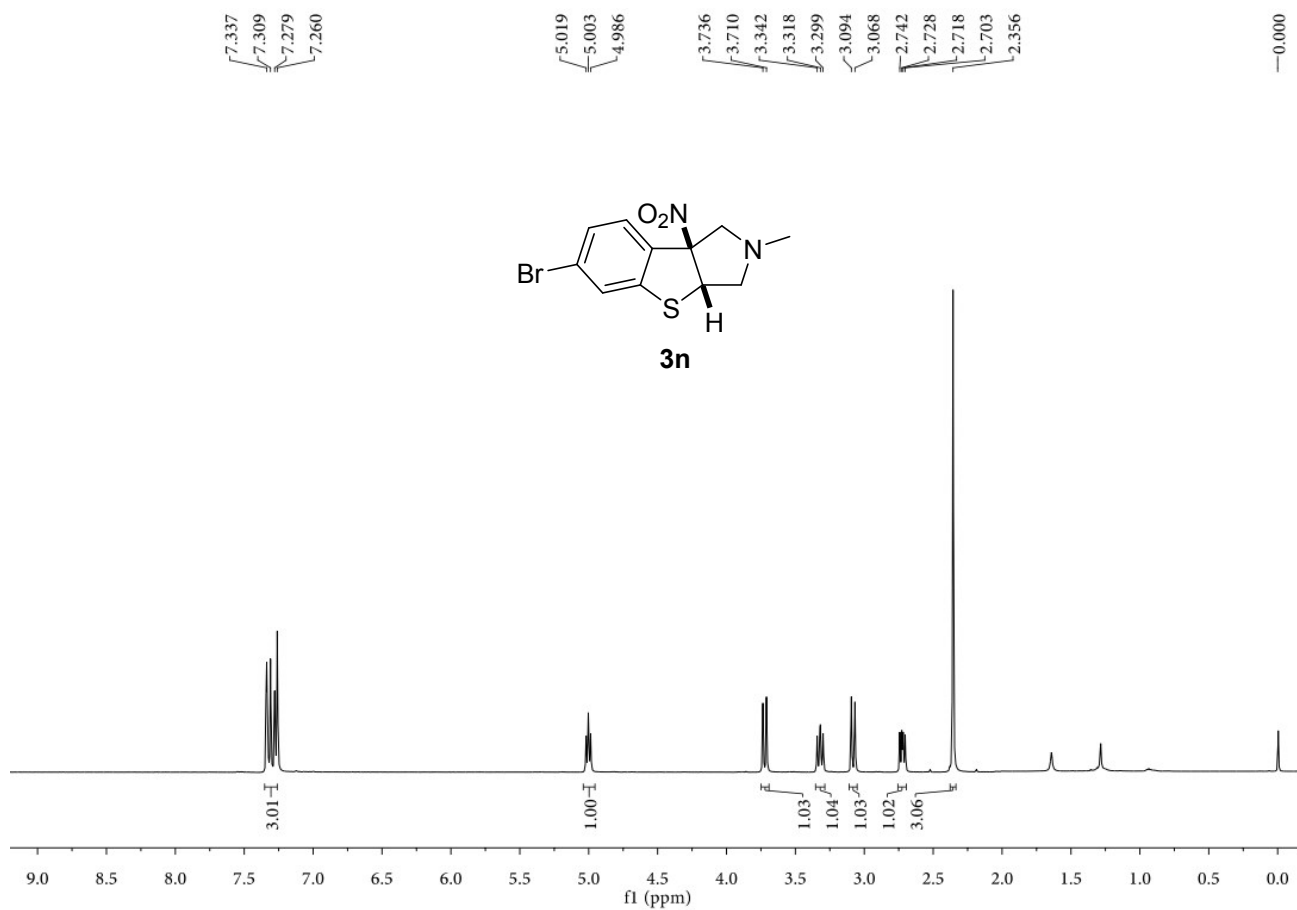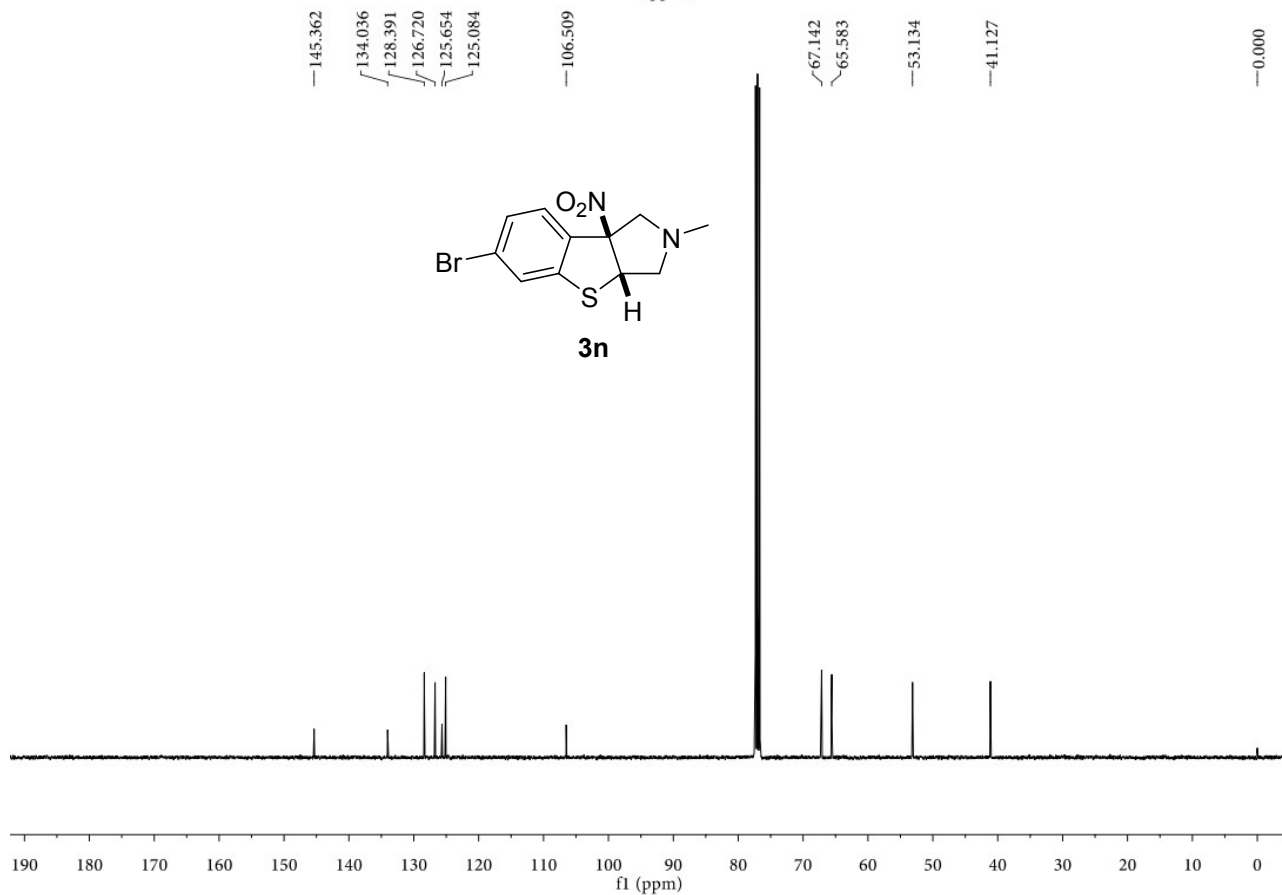

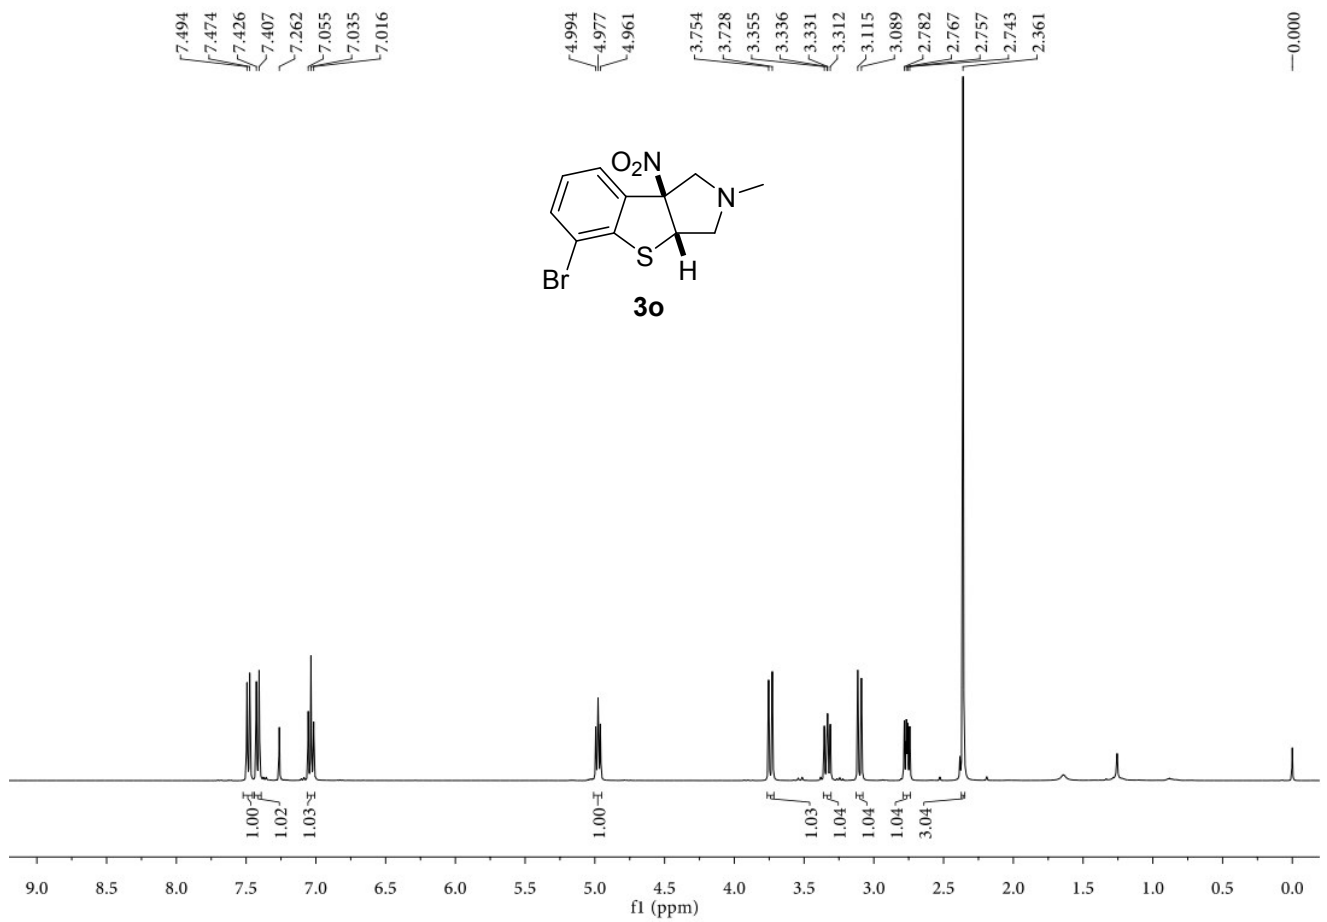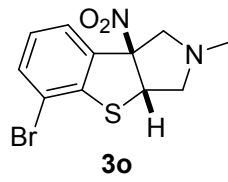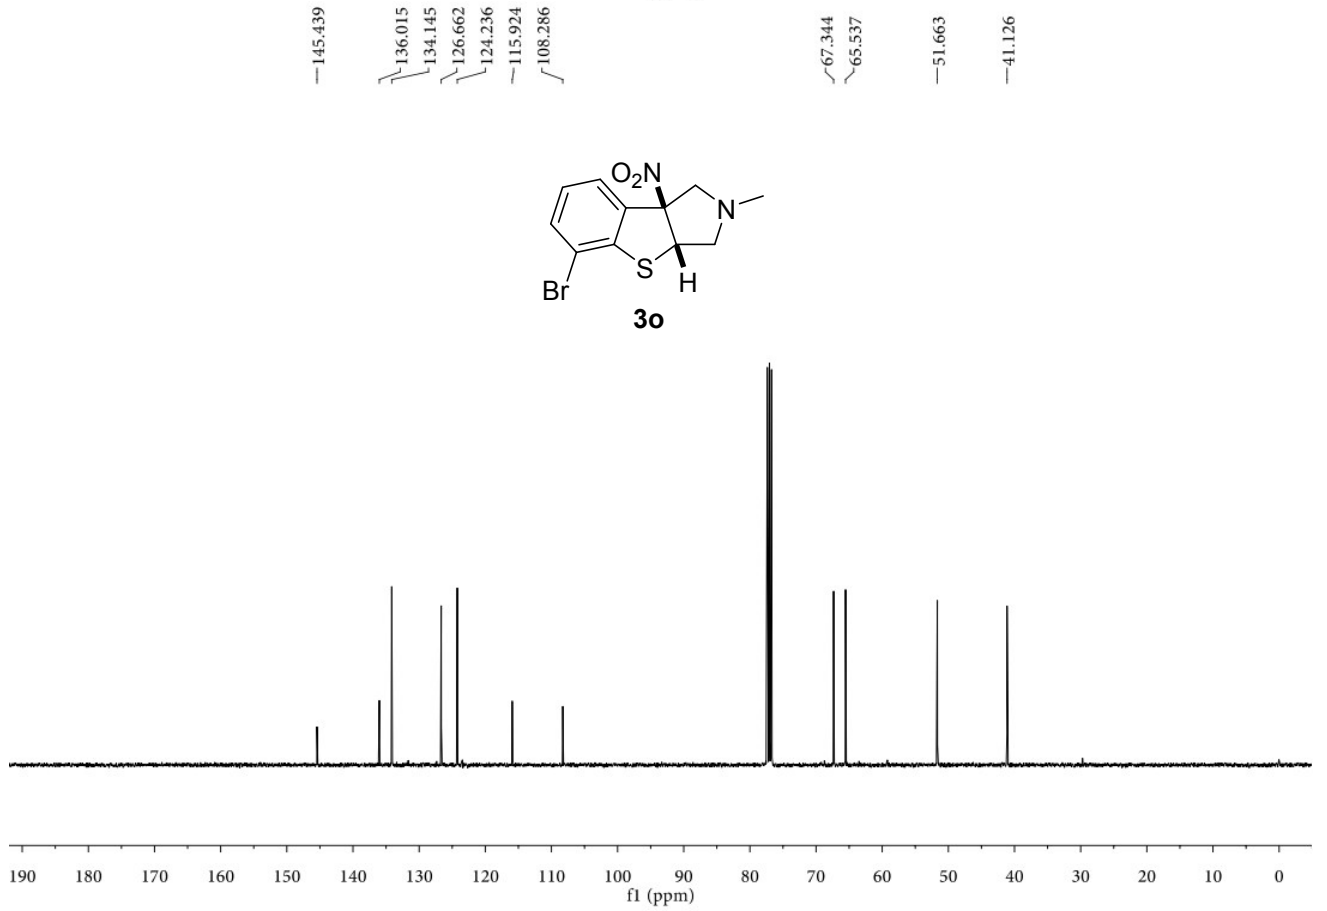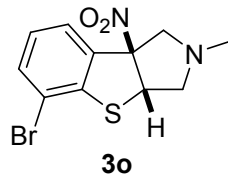

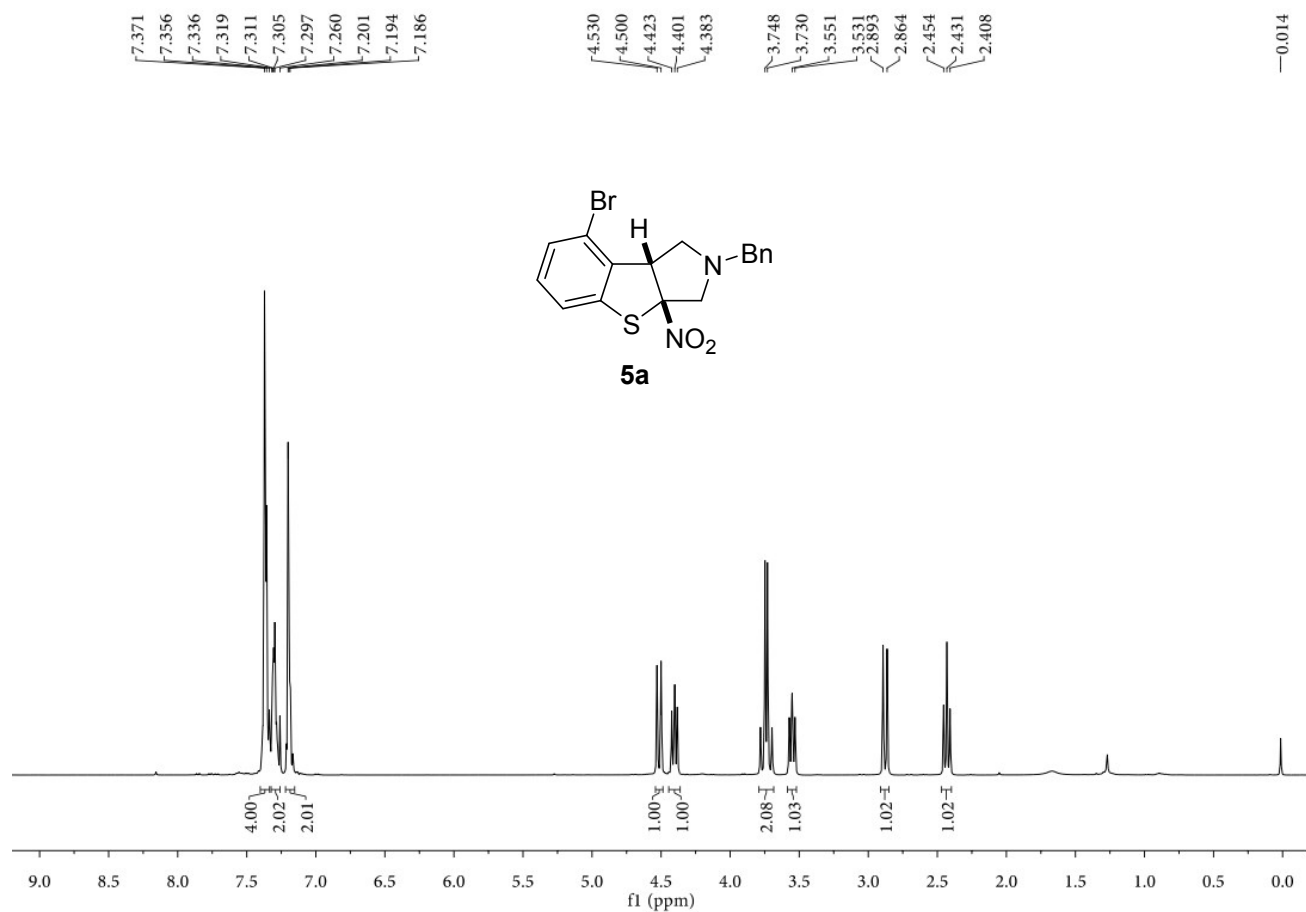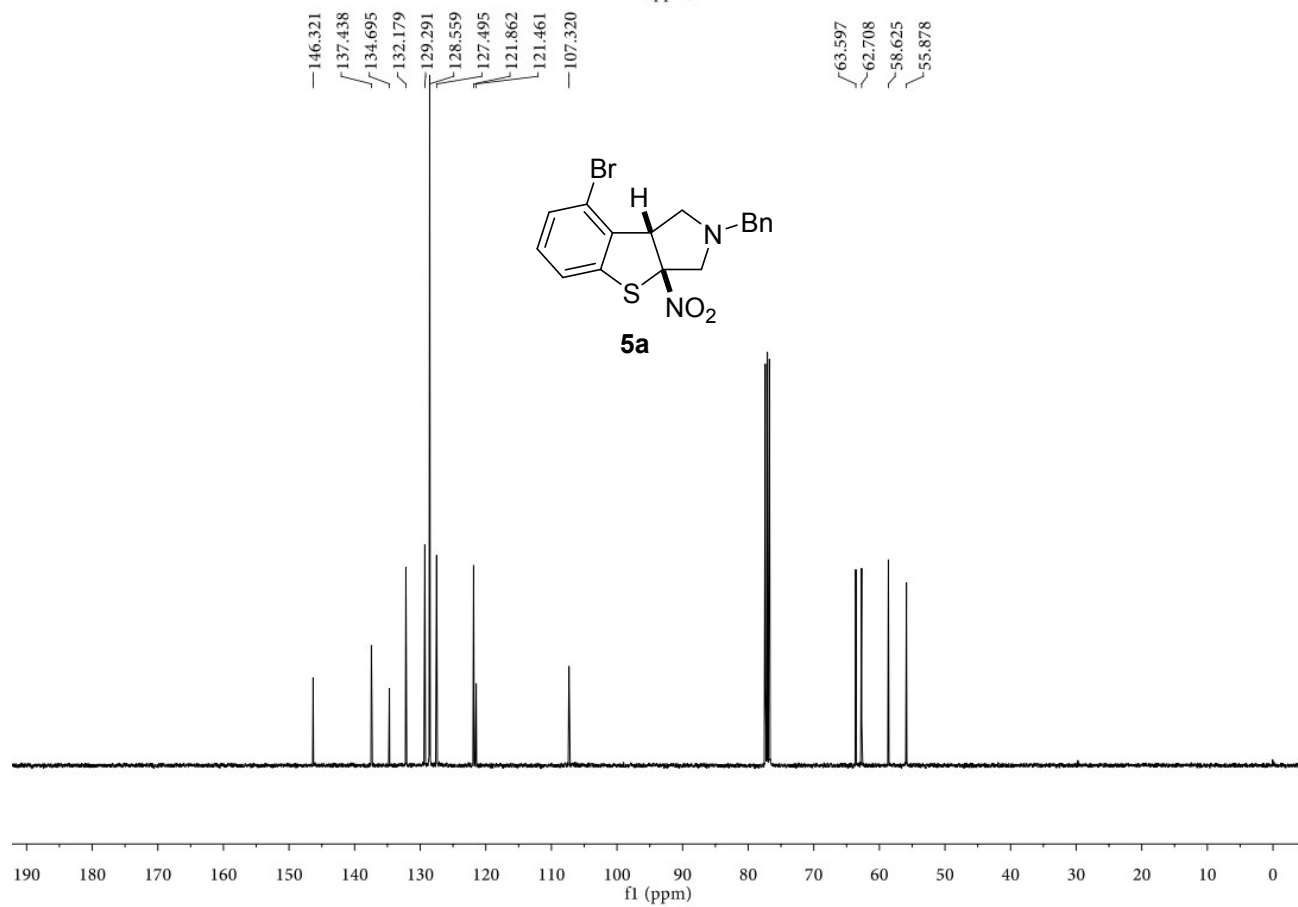

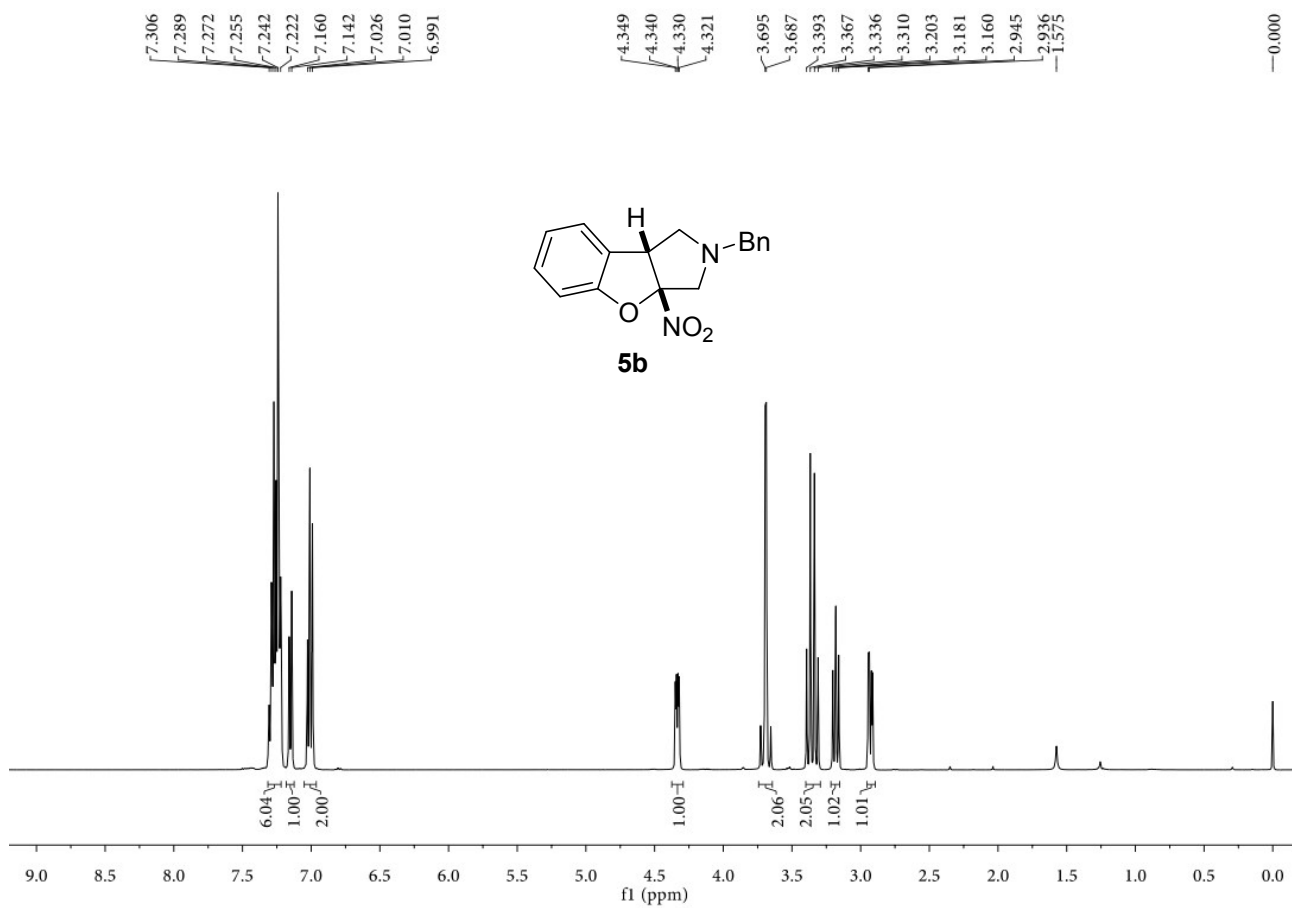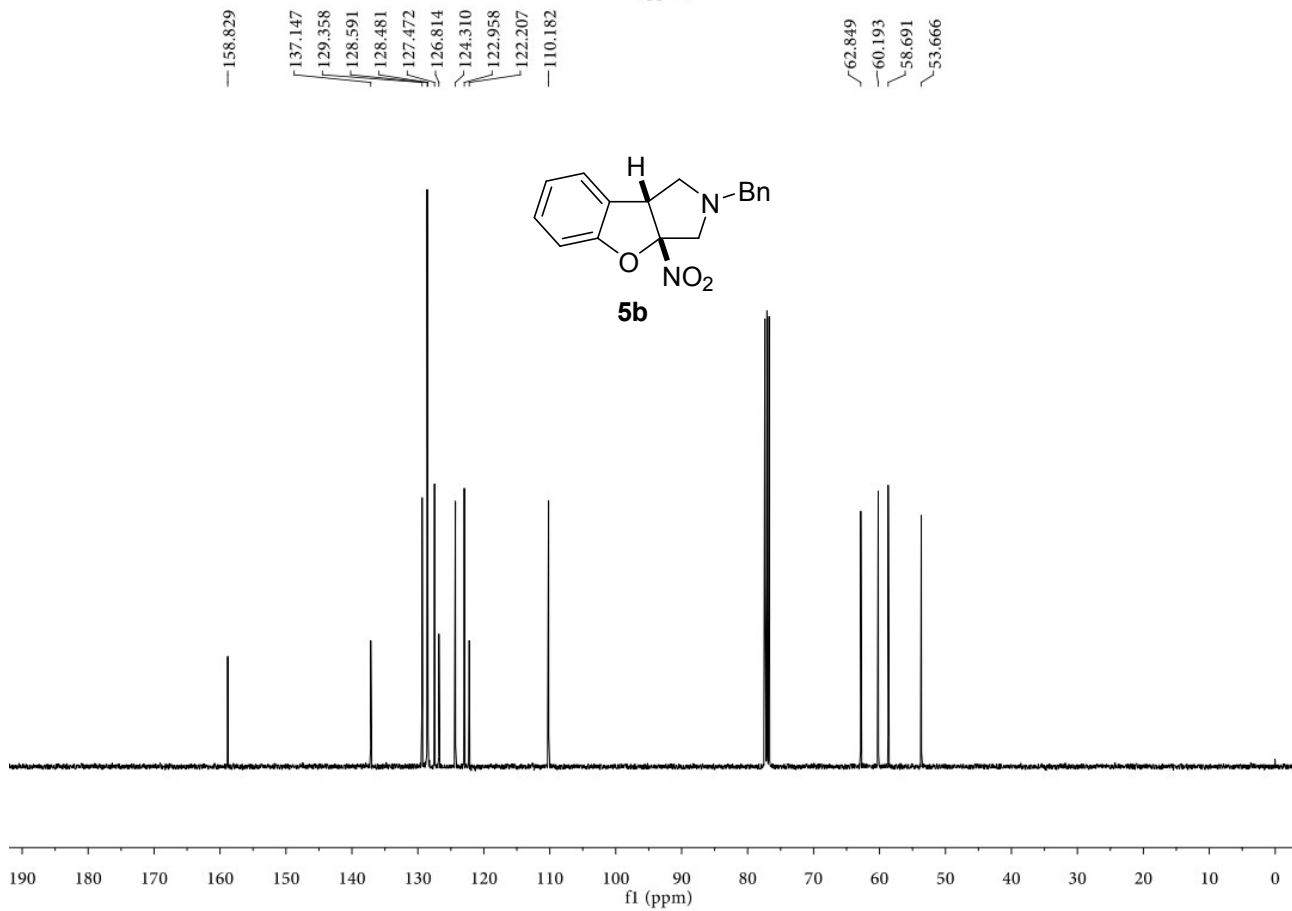

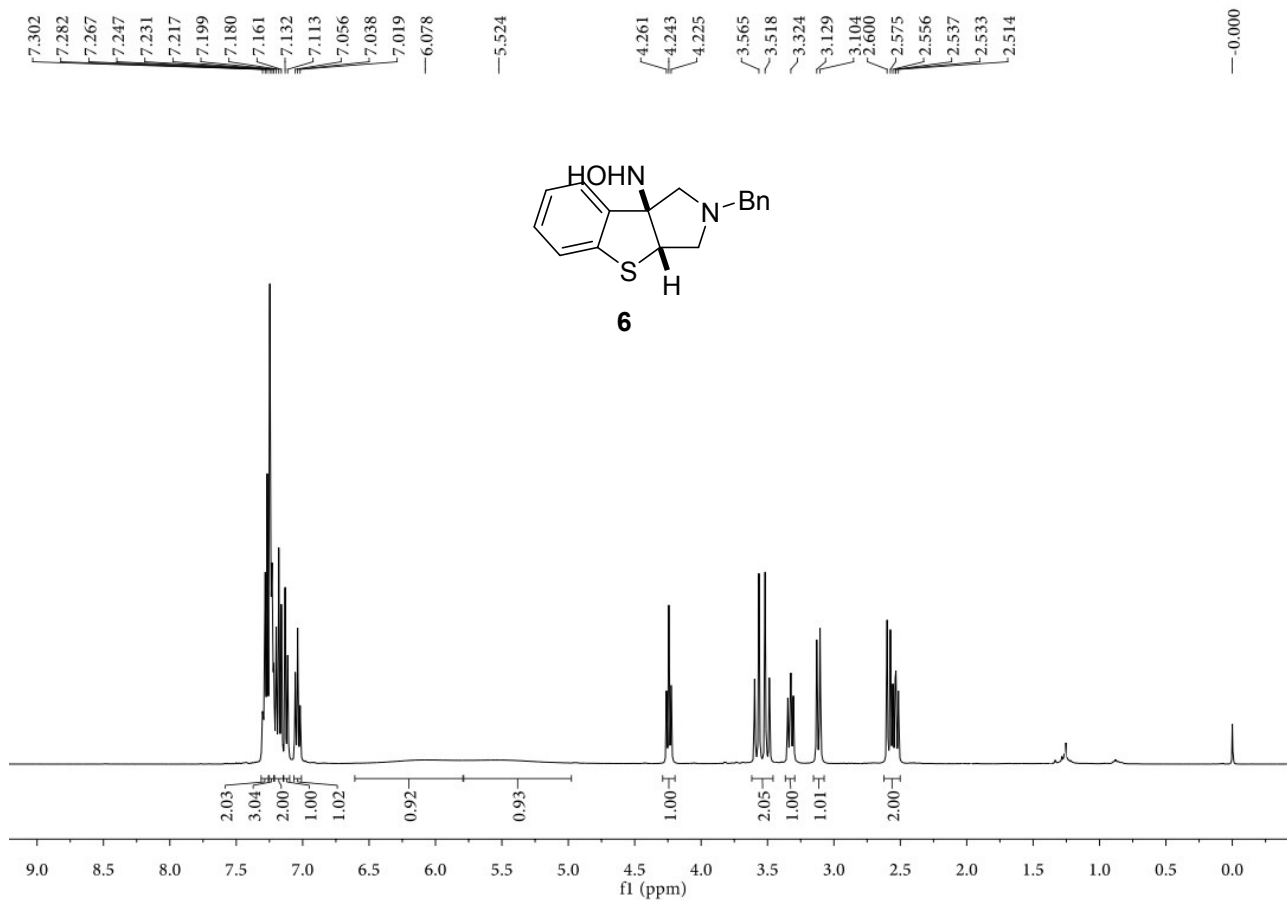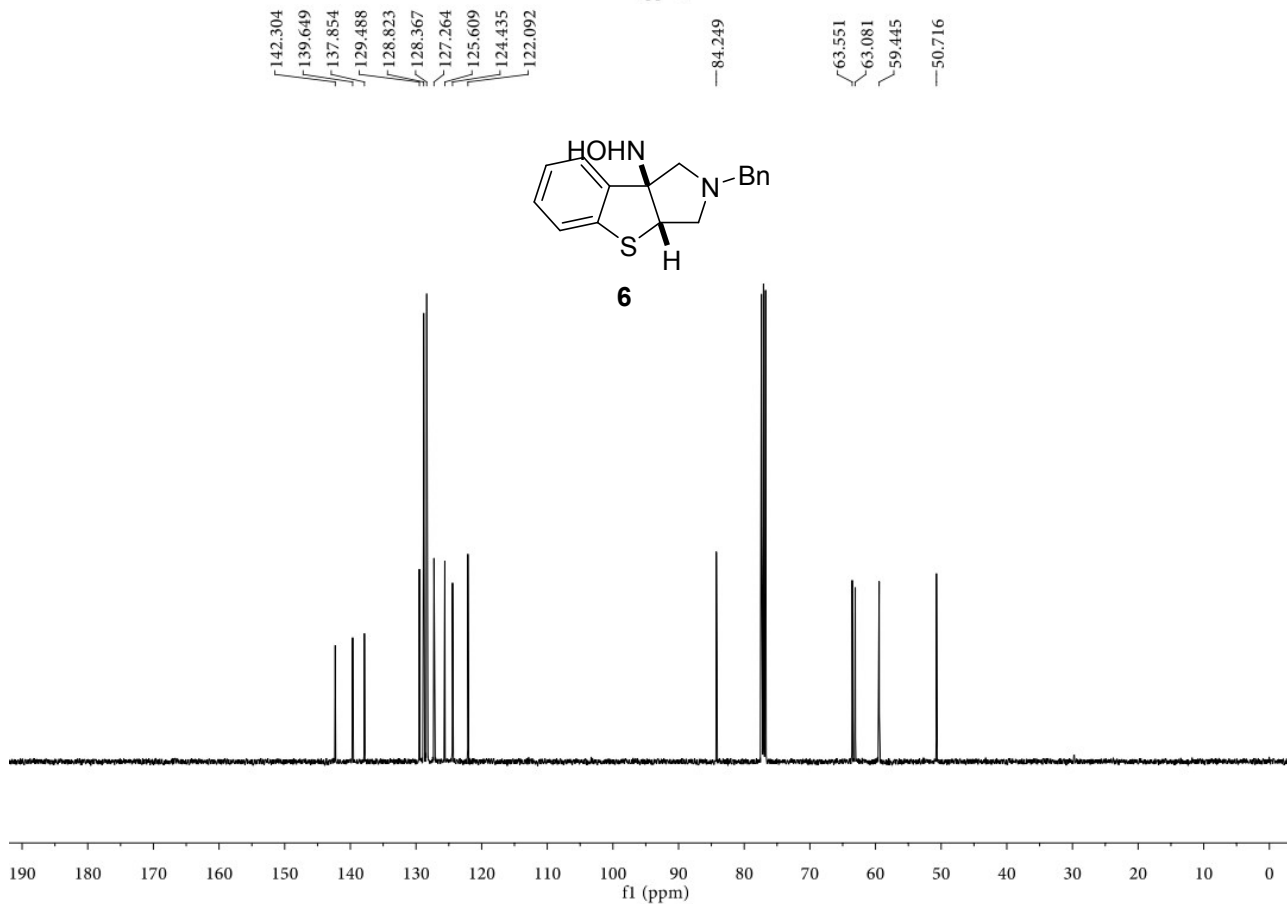



7.287  
7.270  
7.251  
7.239  
7.228  
7.206  
7.187  
7.181  
7.162  
7.115  
7.095  
7.087  
7.068  
7.050

3.849  
3.833  
3.817  
3.645  
3.612  
3.574  
3.541  
3.329  
3.323  
3.305  
2.938  
2.914  
2.818  
2.795  
2.671  
2.657  
2.647  
1.963

-0.000

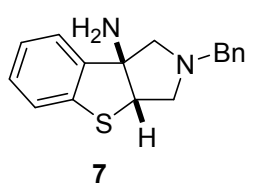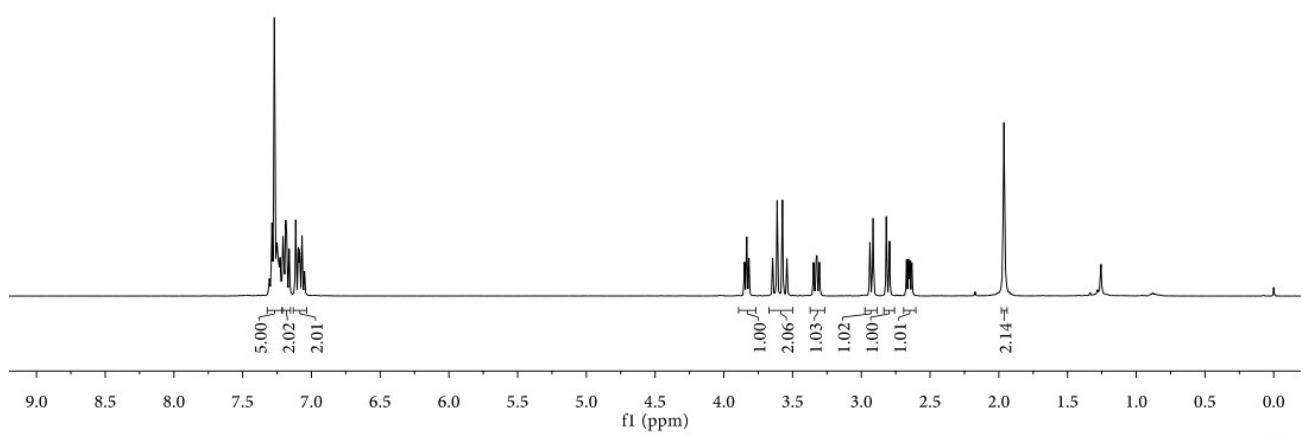

7.292  
7.276  
7.219  
7.201  
7.187  
7.169  
7.117  
7.095  
7.075  
7.057

4.742  
3.864  
3.848  
3.832  
3.650  
3.618  
3.594  
3.562  
3.374  
3.350  
3.332  
2.982  
2.958  
2.810  
2.787  
2.666  
2.651  
2.642  
2.627

-0.000

CDCl<sub>3</sub>+D<sub>2</sub>O

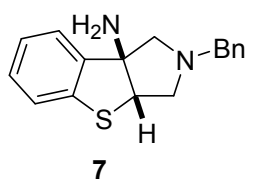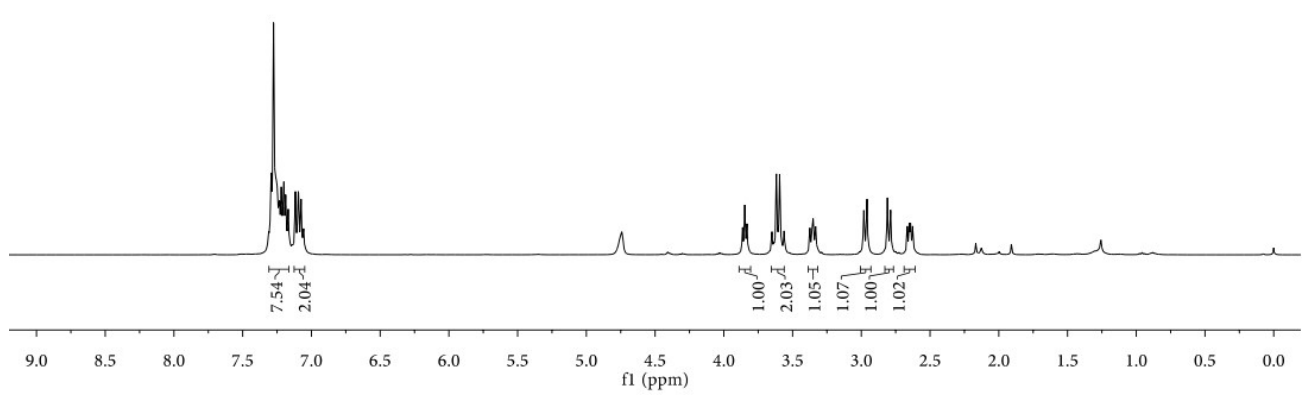

143.686  
 140.591  
 138.218  
 128.973  
 128.723  
 128.325  
 127.140  
 124.893  
 124.698  
 121.838  
 76.484  
 67.945  
 63.292  
 59.450  
 59.131

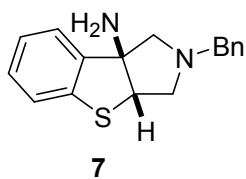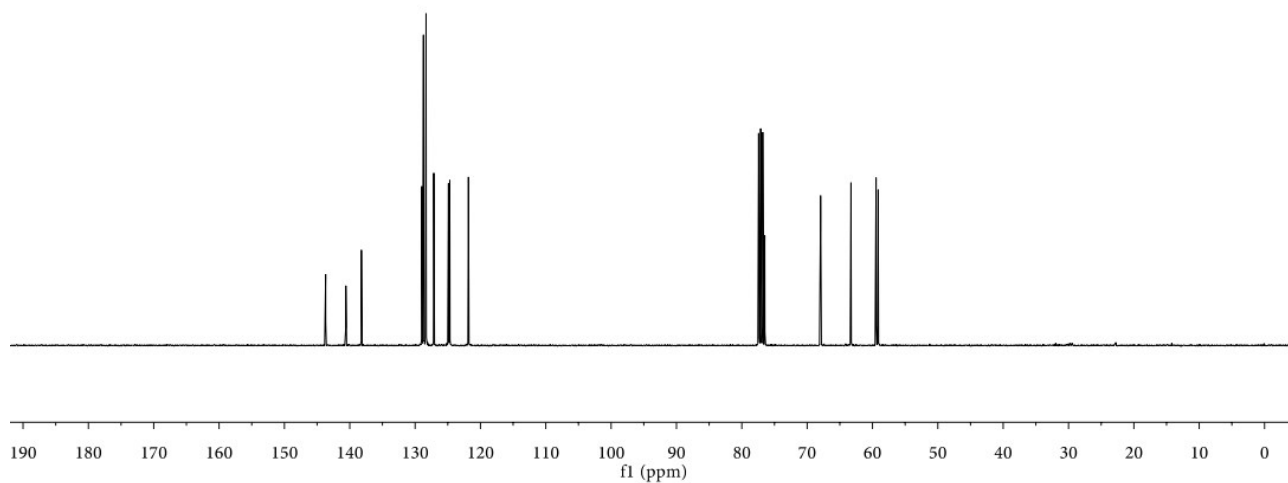

128.974  
 128.726  
 128.327  
 127.141  
 124.893  
 124.699  
 121.839  
 67.945  
 63.294  
 59.451  
 59.128

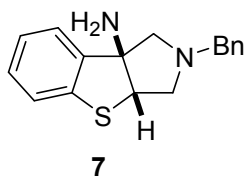

$^{13}\text{C-DEPT}135^\circ$

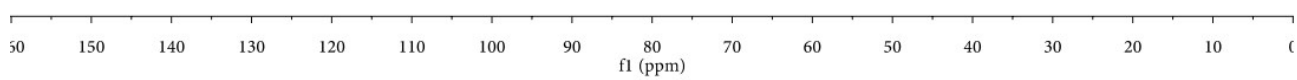

Supplement: d0ra05687a1.pdf [file d0ra05687a1.pdf]
